# Supplementary material for: Pterostilbene Sensitizes Cisplatin-Resistant Human Bladder Cancer Cells with Oncogenic HRAS
Source: MDPI journal article supplement (doi:10.3390/cancers12102869), 2020-10-06

Fig. 3D Cis+Gem+PS\_Caspase3, cleaved-caspase3

IB: anti-caspase 3  
Time (48 h)

|                            |   |   |   |   |   |   |
|----------------------------|---|---|---|---|---|---|
| Cisplatin (4 $\mu$ M)      | - | - | + | - | + | + |
| Gemcitabine (0.4 $\mu$ M)  | - | - | - | + | + | + |
| Pterostilbene (30 $\mu$ M) | - | + | - | - | - | + |

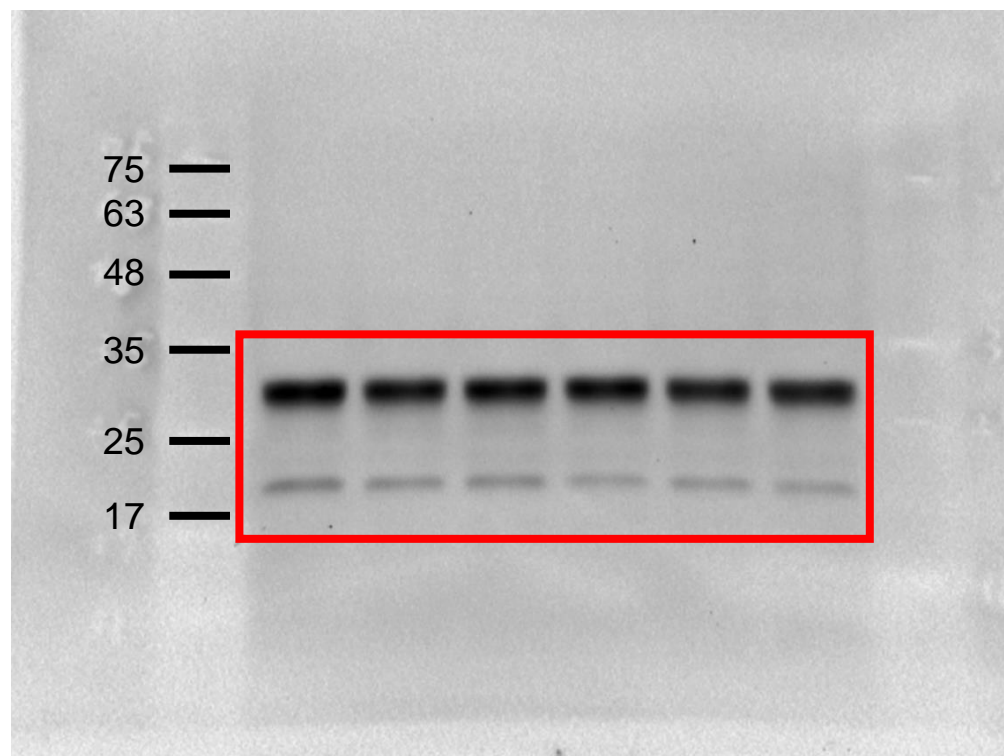

Cleaved-caspase 3 1 0.57 0.65 0.50 0.61 0.59

Fig. 3D Cis+Gem+PS\_LC3-I, LC3-II

IB: anti-LC3B

Time (48 h)

|                            |   |   |   |   |   |   |
|----------------------------|---|---|---|---|---|---|
| Cisplatin (4 $\mu$ M)      | - | - | + | - | + | + |
| Gemcitabine (0.4 $\mu$ M)  | - | - | - | + | + | + |
| Pterostilbene (30 $\mu$ M) | - | + | - | - | - | + |

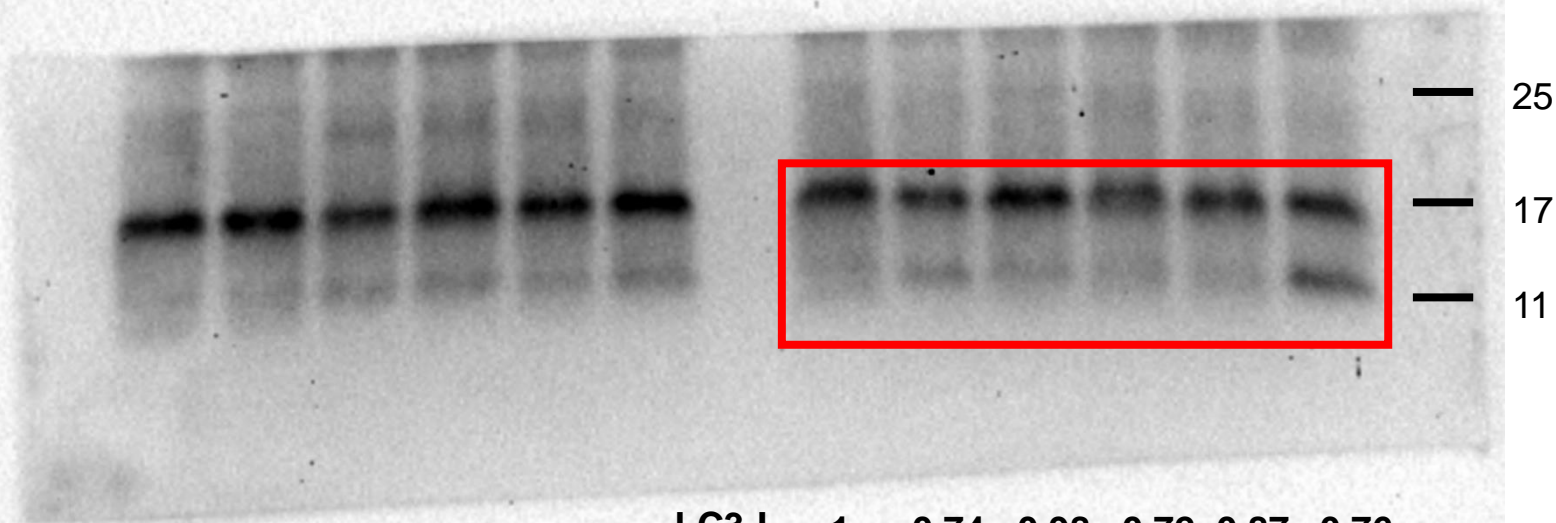

|        |   |      |      |      |      |      |
|--------|---|------|------|------|------|------|
| LC3-I  | 1 | 0.74 | 0.98 | 0.72 | 0.87 | 0.76 |
| LC3-II | 1 | 1.28 | 1.62 | 1.21 | 1.45 | 1.79 |

Fig. 3D Cis+Gem+PS\_beta actin

IB: anti- $\beta$  actin

Time (48 h)

|                            |   |   |   |   |   |   |
|----------------------------|---|---|---|---|---|---|
| Cisplatin (4 $\mu$ M)      | - | - | + | - | + | + |
| Gemcitabine (0.4 $\mu$ M)  | - | - | - | + | + | + |
| Pterostilbene (30 $\mu$ M) | - | + | - | - | - | + |

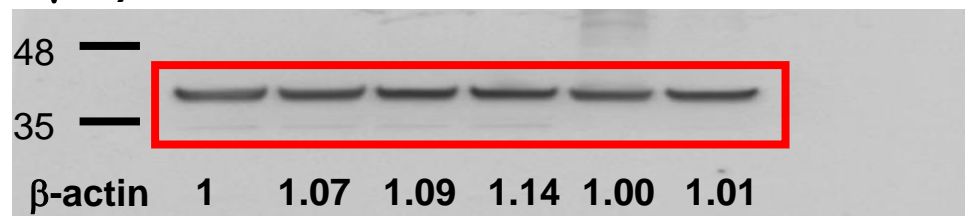

Fig. S5C Car+Gem+PS\_Caspase3, cleaved-caspase3

IB: anti-caspase 3  
Time (48 h)

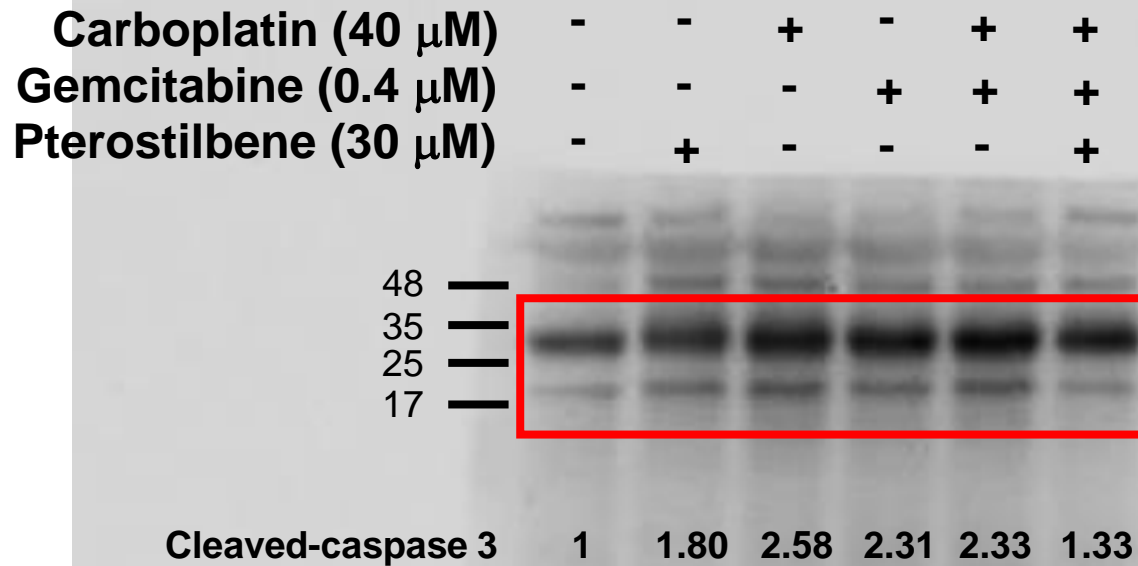

Fig. S5C Car+Gem+PS\_LC3-I, LC3-II

IB: anti-LC3B

Time (48 h)

|                            |   |   |   |   |   |   |
|----------------------------|---|---|---|---|---|---|
| Carboplatin (40 $\mu$ M)   | - | - | + | - | + | + |
| Gemcitabine (0.4 $\mu$ M)  | - | - | - | + | + | + |
| Pterostilbene (30 $\mu$ M) | - | + | - | - | - | + |

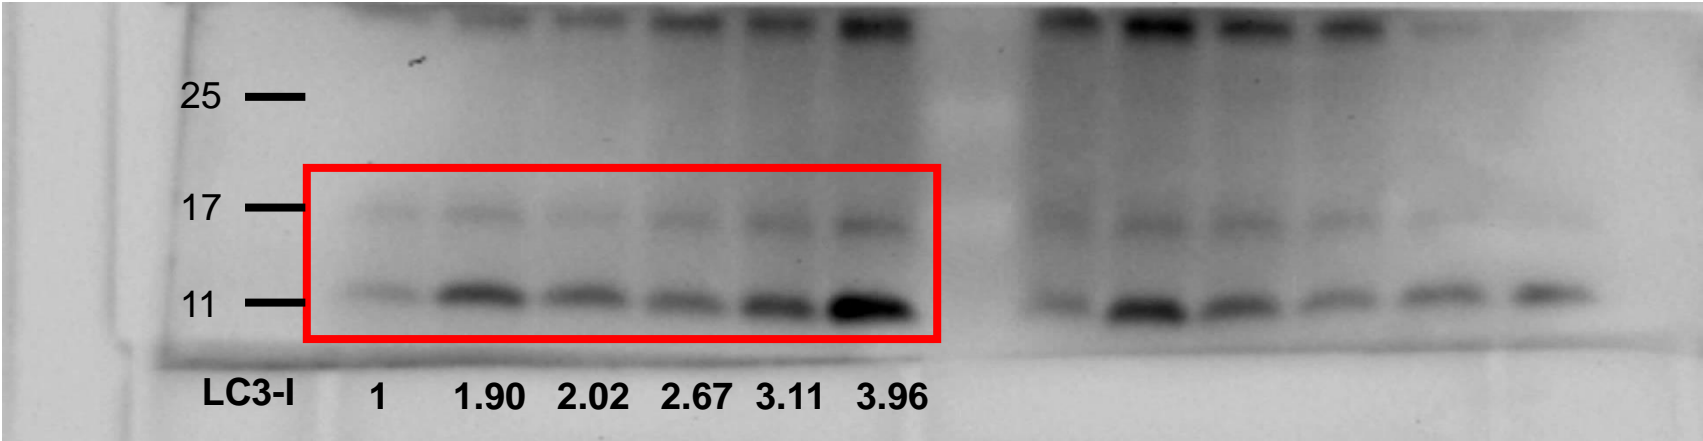

|        |   |      |      |      |      |      |
|--------|---|------|------|------|------|------|
| LC3-I  | 1 | 1.90 | 2.02 | 2.67 | 3.11 | 3.96 |
| LC3-II | 1 | 2.56 | 2.39 | 2.37 | 2.85 | 4.42 |

Fig. S5C Car+Gem+PS\_beta actin

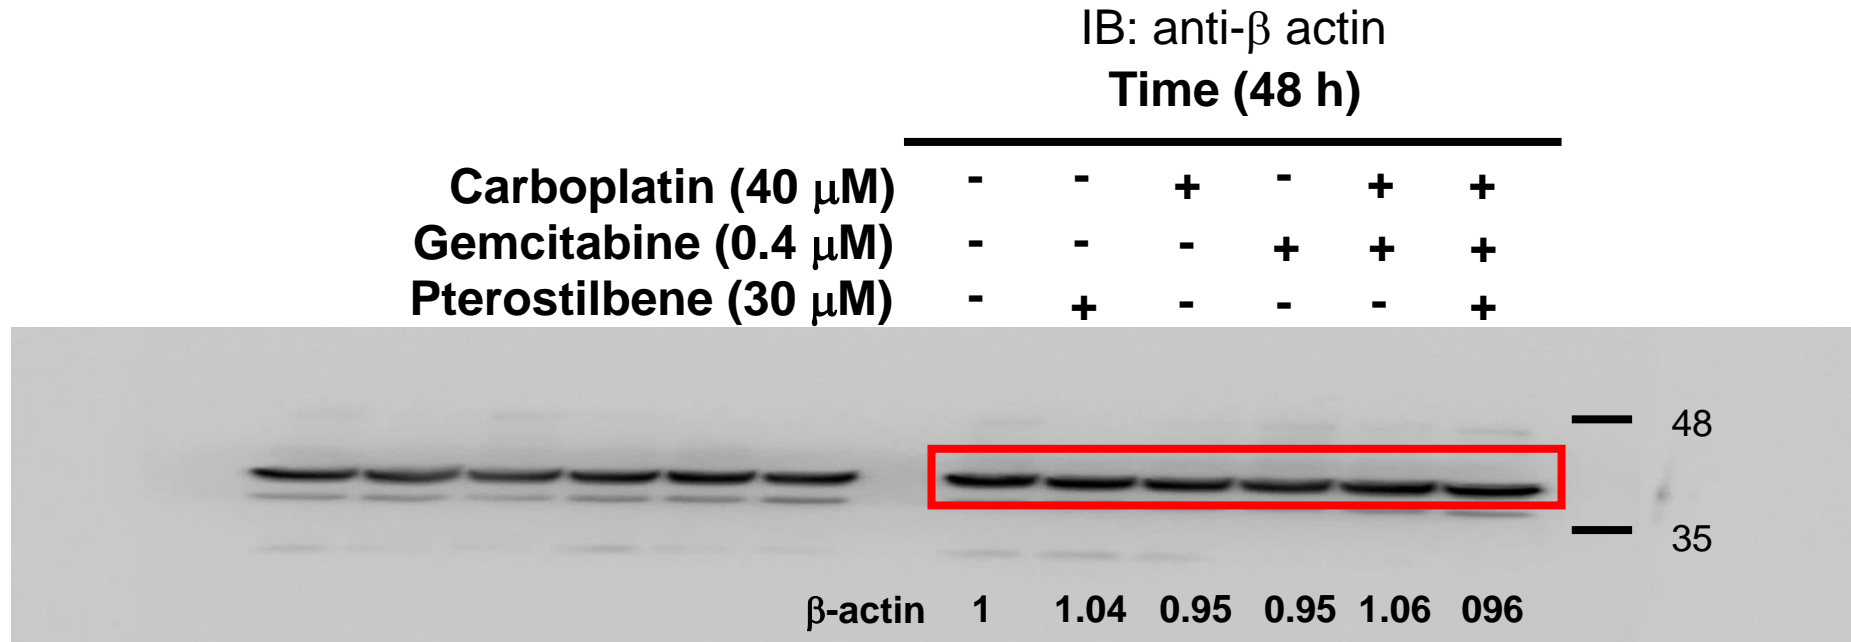

Fig. 4A Cis+Gem+PS\_Atg12-Atg5, Atg5

IB: anti-Atg5

Time (48 h)

|                            |   |   |   |   |   |   |
|----------------------------|---|---|---|---|---|---|
| Cisplatin (4 $\mu$ M)      | - | - | + | - | + | + |
| Gemcitabine (0.4 $\mu$ M)  | - | - | - | + | + | + |
| Pterostilbene (30 $\mu$ M) | - | + | - | - | - | + |

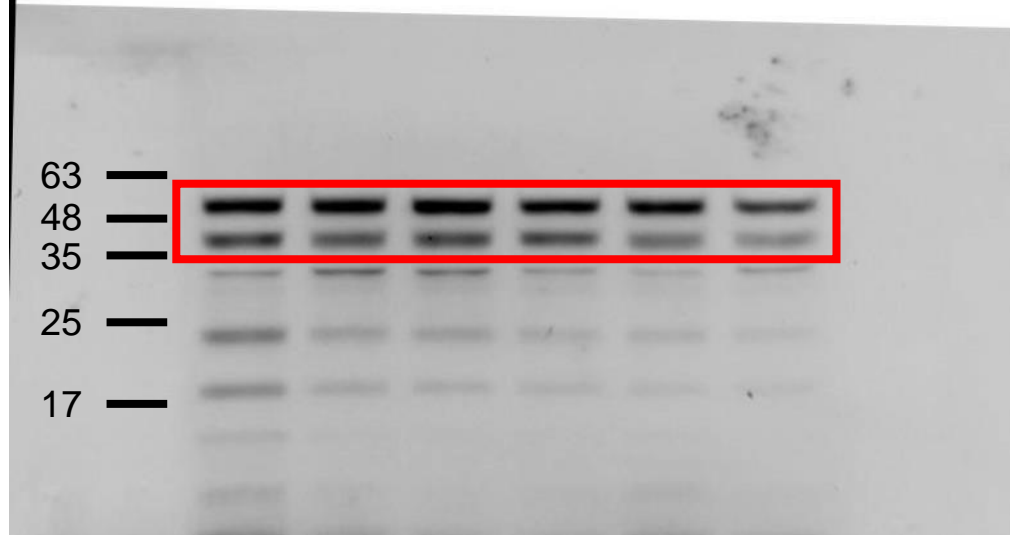

|            |   |      |      |      |      |      |
|------------|---|------|------|------|------|------|
| Atg12-Atg5 | 1 | 1.06 | 1.23 | 1.06 | 1.12 | 0.72 |
| Atg5       | 1 | 0.96 | 1.19 | 1.07 | 0.89 | 0.56 |

Fig. 4A Cis+Gem+PS\_beta actin (Atg12-Atg5, Atg5)

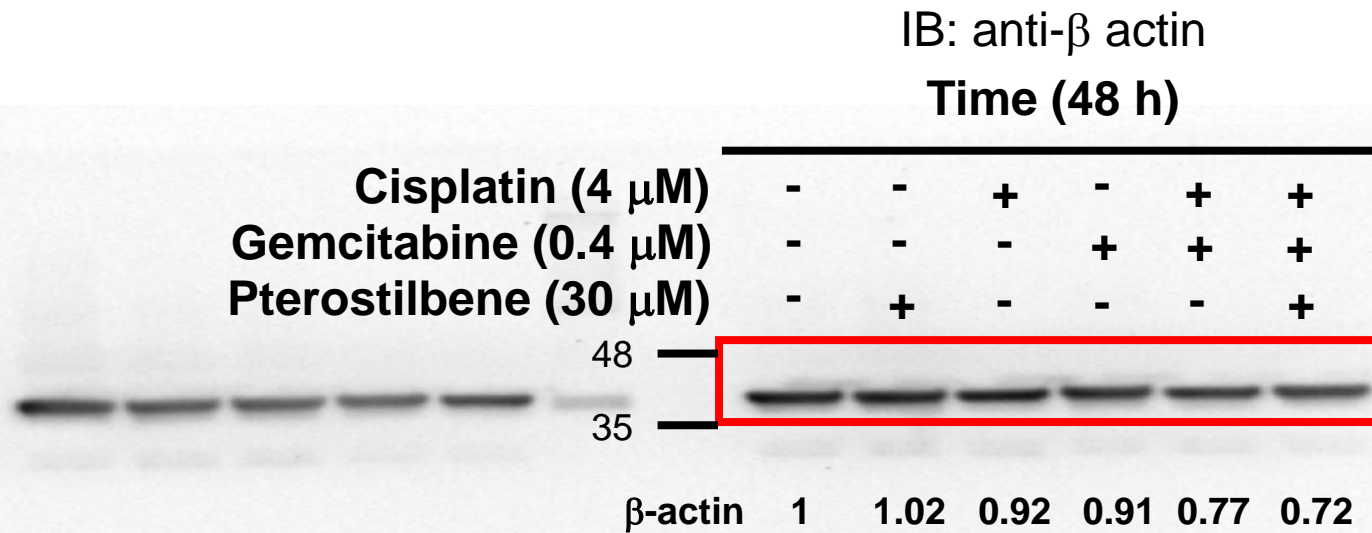



Fig. 4A Cis+Gem+PS\_Class III PI3K

IB: anti-Class III PI3K

Time (48 h)

|                            |   |   |   |   |   |   |
|----------------------------|---|---|---|---|---|---|
| Cisplatin (4 $\mu$ M)      | - | - | + | - | + | + |
| Gemcitabine (0.4 $\mu$ M)  | - | - | - | + | + | + |
| Pterostilbene (30 $\mu$ M) | - | + | - | - | - | + |

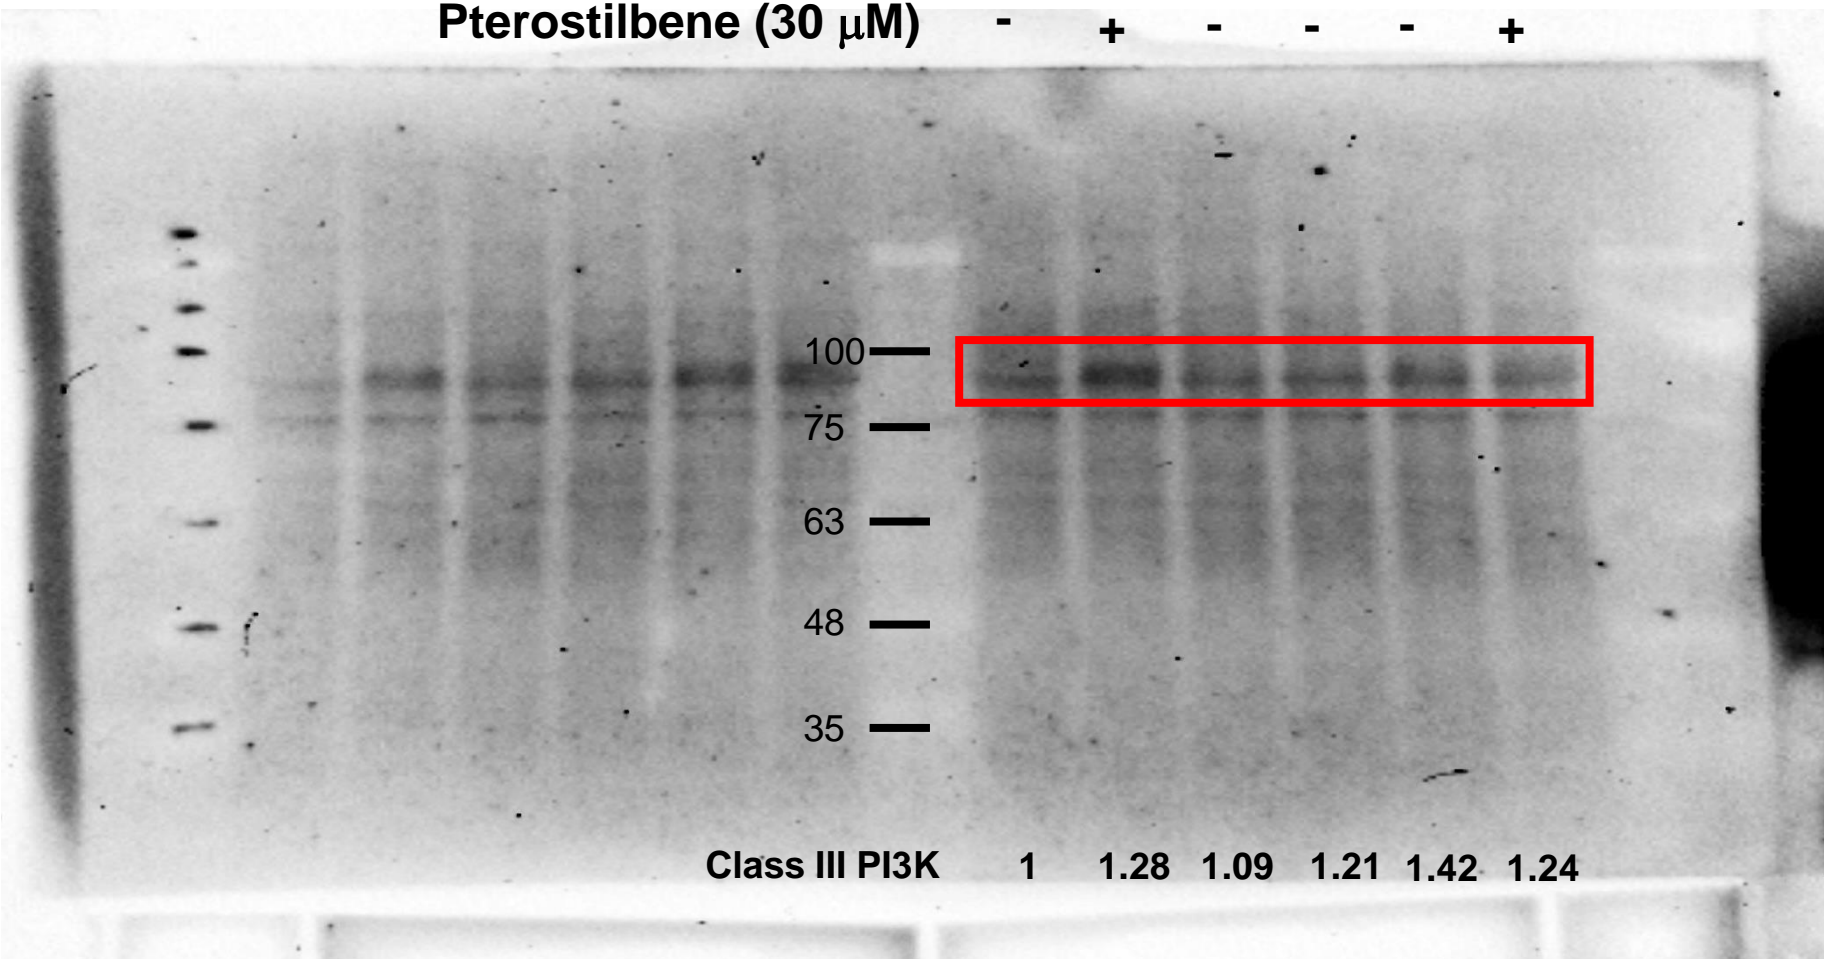

Fig. 4A Cis+Gem+PS\_beta actin (Class III PI3K)

IB: anti- $\beta$  actin

Time (48 h)

| Cisplatin (4 $\mu$ M)      | - | - | + | - | + | + |
|----------------------------|---|---|---|---|---|---|
| Gemcitabine (0.4 $\mu$ M)  | - | - | - | + | + | + |
| Pterostilbene (30 $\mu$ M) | - | + | - | - | - | + |

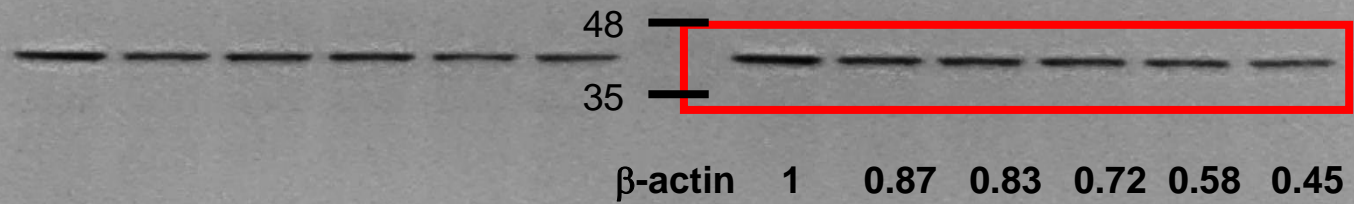

Fig. 4A Car+Gem+PS\_Atg12-Atg5, Atg5

IB: anti-Atg5

Time (48 h)

|                            |   |   |   |   |   |   |
|----------------------------|---|---|---|---|---|---|
| Carboplatin (40 $\mu$ M)   | - | - | + | - | + | + |
| Gemcitabine (0.4 $\mu$ M)  | - | - | - | + | + | + |
| Pterostilbene (30 $\mu$ M) | - | + | - | - | - | + |

63 —

48 —

35 —

25 —

|            |   |      |      |      |      |      |
|------------|---|------|------|------|------|------|
| Atg12-Atg5 | 1 | 0.94 | 0.85 | 1.15 | 1.23 | 1.12 |
| Atg5       | 1 | 1.12 | 1.13 | 1.40 | 1.44 | 1.27 |

Fig. 4A Car+Gem+PS\_beta actin (Atg12-Atg5, Atg5)

IB: anti- $\beta$  actin

Time (48 h)

|                            |                                                                                    |      |      |      |      |      |                                                                                     |
|----------------------------|------------------------------------------------------------------------------------|------|------|------|------|------|-------------------------------------------------------------------------------------|
| Carboplatin (40 $\mu$ M)   | -                                                                                  | -    | +    | -    | +    | +    |                                                                                     |
| Gemcitabine (0.4 $\mu$ M)  | -                                                                                  | -    | -    | +    | +    | +    |                                                                                     |
| Pterostilbene (30 $\mu$ M) | -                                                                                  | +    | -    | -    | -    | +    |                                                                                     |
| 48                         | 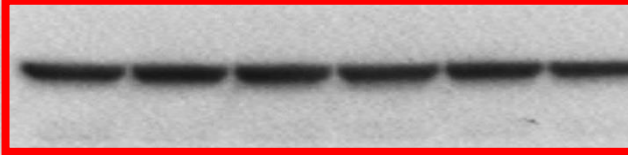 |      |      |      |      |      |  |
| 35                         |                                                                                    |      |      |      |      |      |  |
| $\beta$ -actin             | 1                                                                                  | 1.00 | 1.01 | 1.00 | 0.97 | 0.83 |                                                                                     |

Fig. 4A Car+Gem+PS\_Class III PI3K

IB: anti-Class III PI3K

Time (48 h)

|                            |   |   |   |   |   |   |
|----------------------------|---|---|---|---|---|---|
| Carboplatin (40 $\mu$ M)   | - | - | + | - | + | + |
| Gemcitabine (0.4 $\mu$ M)  | - | - | - | + | + | + |
| Pterostilbene (30 $\mu$ M) | - | + | - | - | - | + |

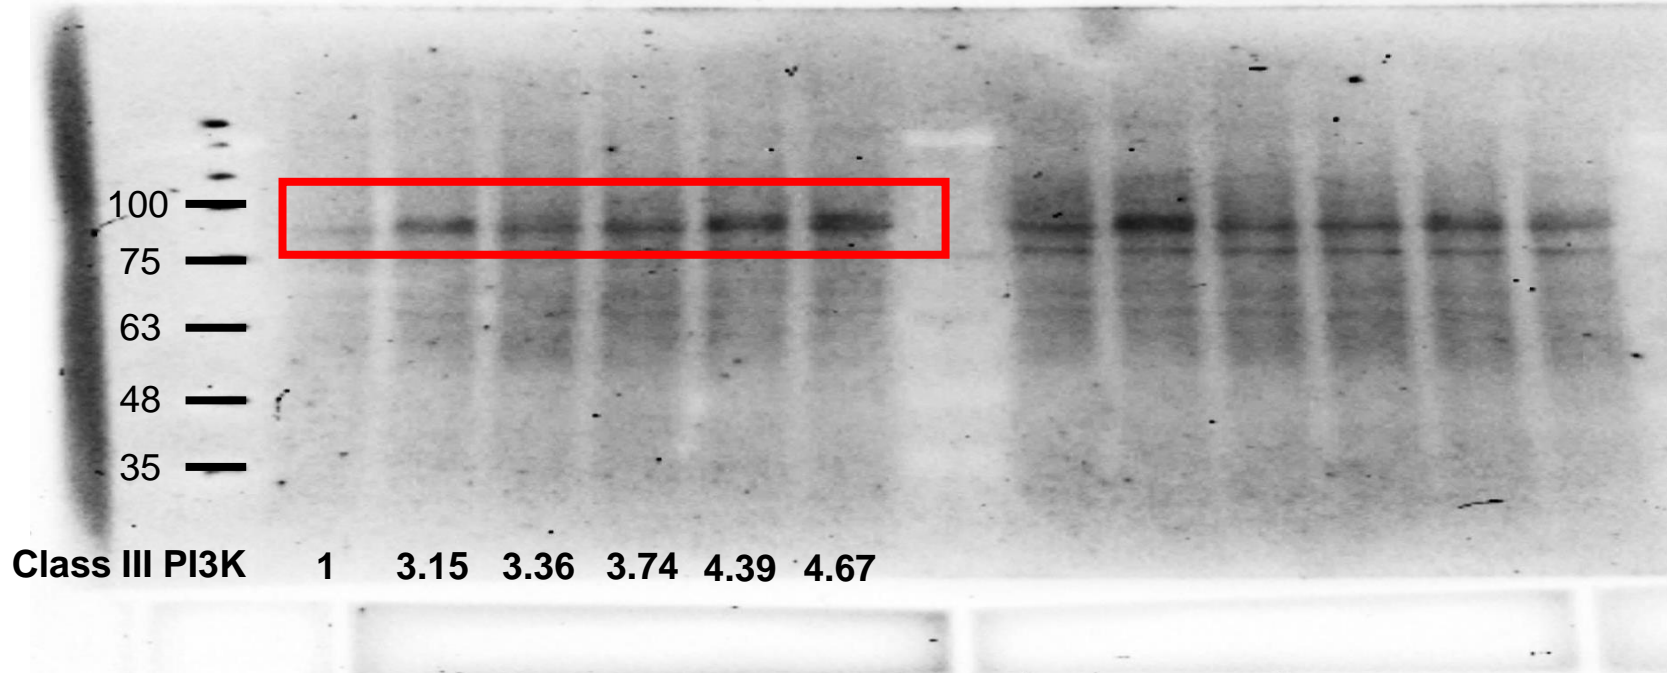



Fig. 4A Car+Gem+PS\_beta actin (Class III PI3K)

IB: anti- $\beta$  actin

Time (48 h)

|                            |   |   |   |   |   |   |
|----------------------------|---|---|---|---|---|---|
| Carboplatin (4 $\mu$ M)    | - | - | + | - | + | + |
| Gemcitabine (0.4 $\mu$ M)  | - | - | - | + | + | + |
| Pterostilbene (30 $\mu$ M) | - | + | - | - | - | + |

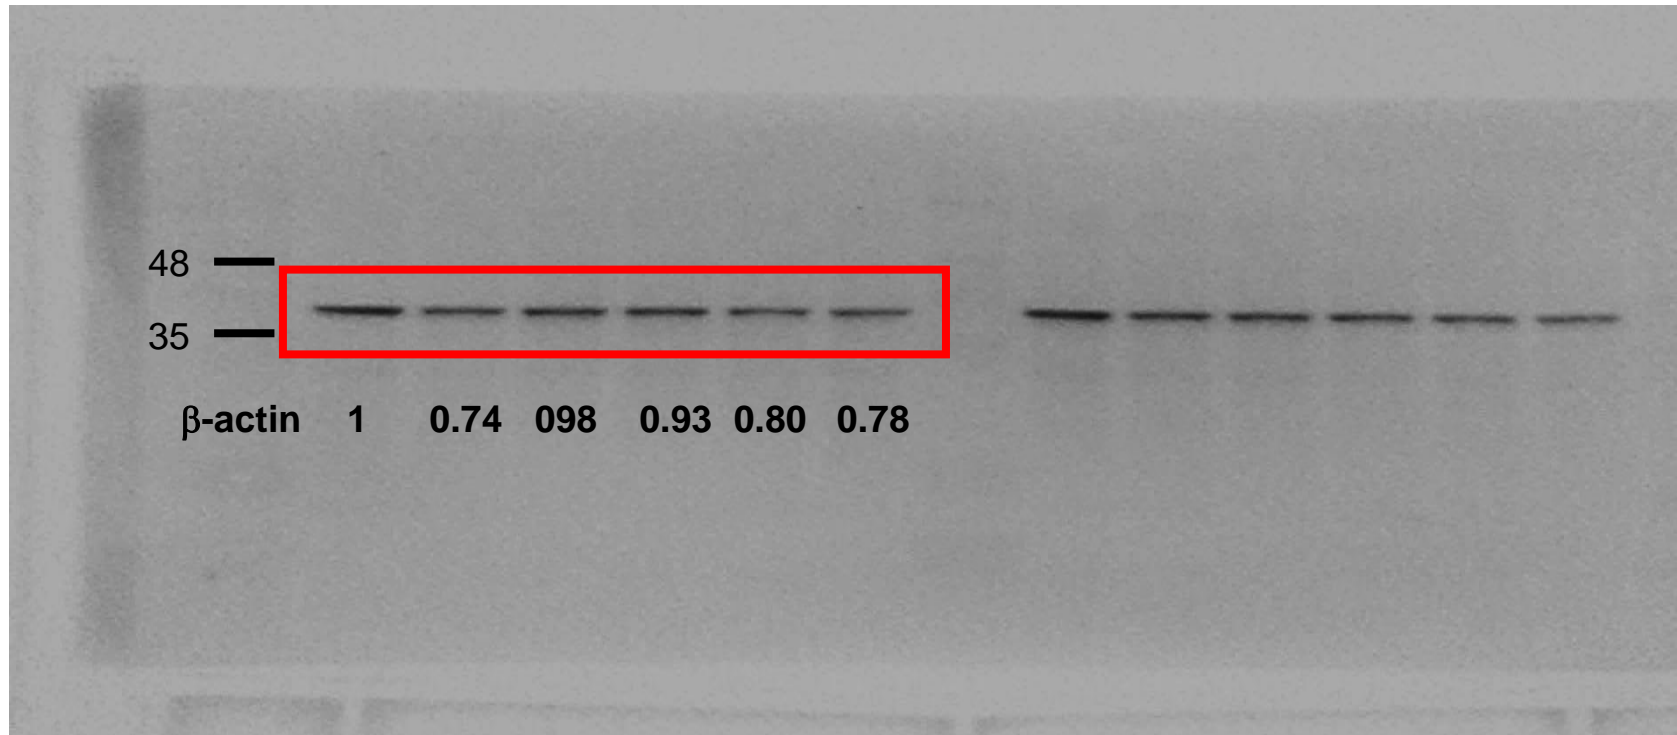

Fig. 4B Cis+Gem+PS\_p-Class I PI3K

IB: anti-p-Class I PI3K

Time (48 h)

|                            |   |   |   |   |   |   |
|----------------------------|---|---|---|---|---|---|
| Cisplatin (4 $\mu$ M)      | - | - | + | - | + | + |
| Gemcitabine (0.4 $\mu$ M)  | - | - | - | + | + | + |
| Pterostilbene (30 $\mu$ M) | - | + | - | - | - | + |

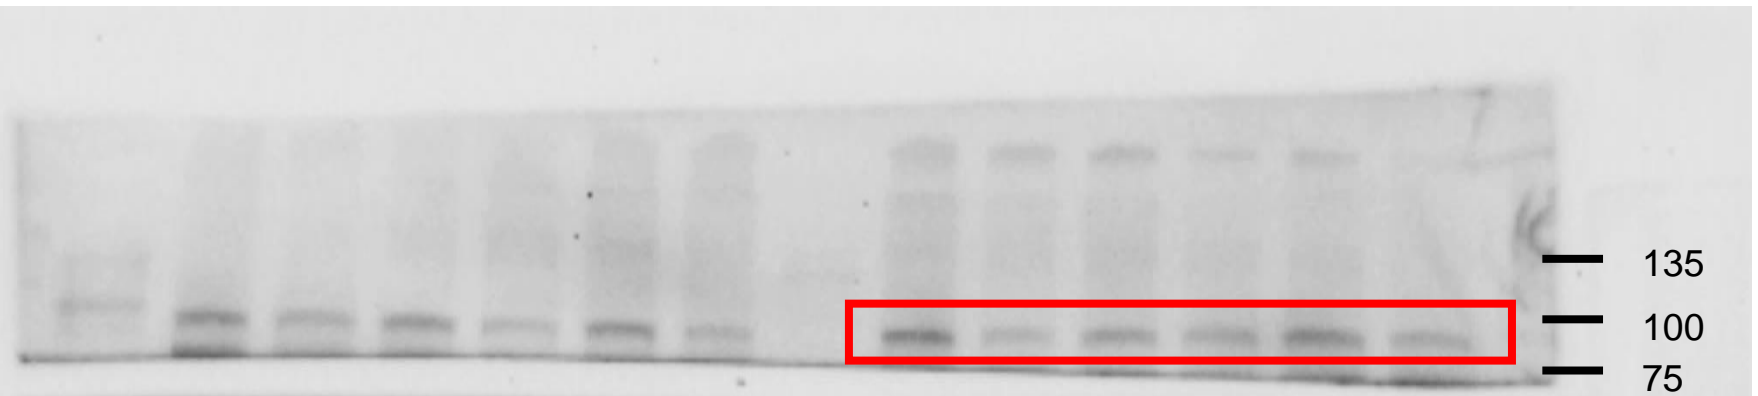

p-class I PI3K    1    0.42    0.73    0.85    1.51    1.00

Fig. 4B Cis+Gem+PS\_p-mTOR

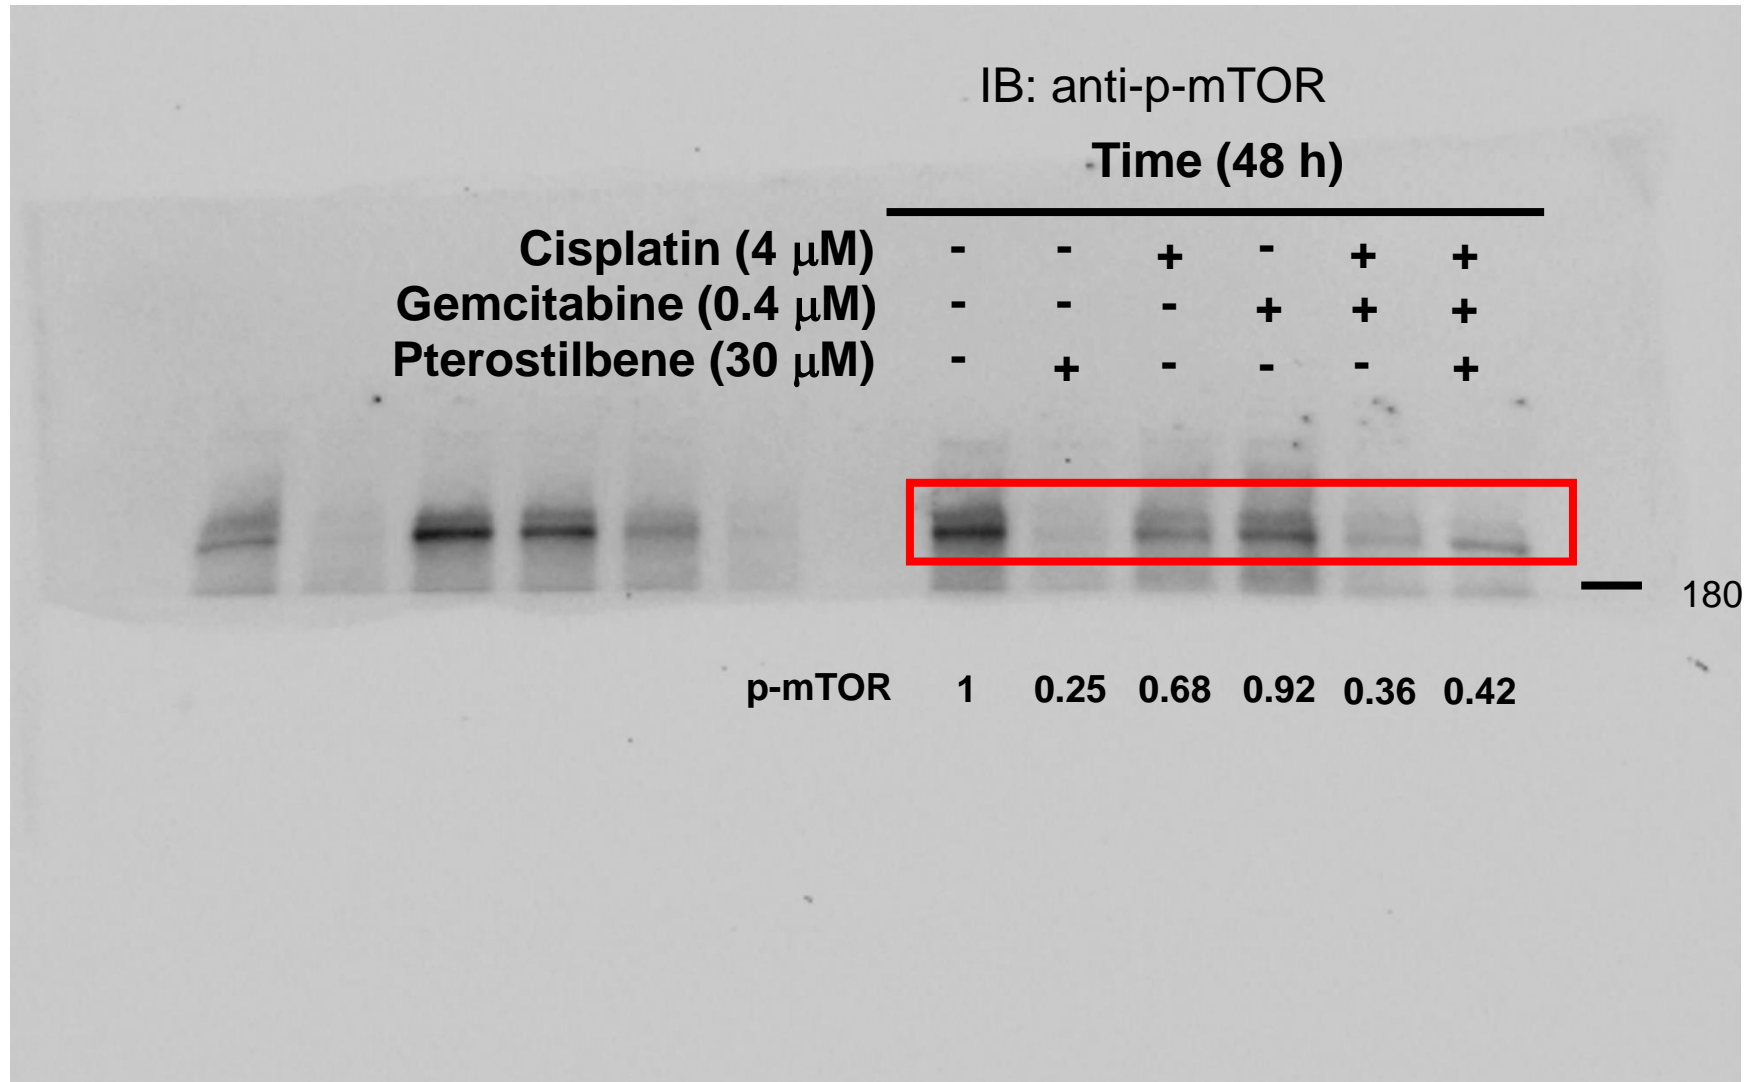



Fig. 4B Cis+Gem+PS\_p-p70S6K

IB: anti-p-p70S6K

Time (48 h)

|                            |   |   |   |   |   |   |
|----------------------------|---|---|---|---|---|---|
| Cisplatin (4 $\mu$ M)      | - | - | + | - | + | + |
| Gemcitabine (0.4 $\mu$ M)  | - | - | - | + | + | + |
| Pterostilbene (30 $\mu$ M) | - | + | - | - | - | + |

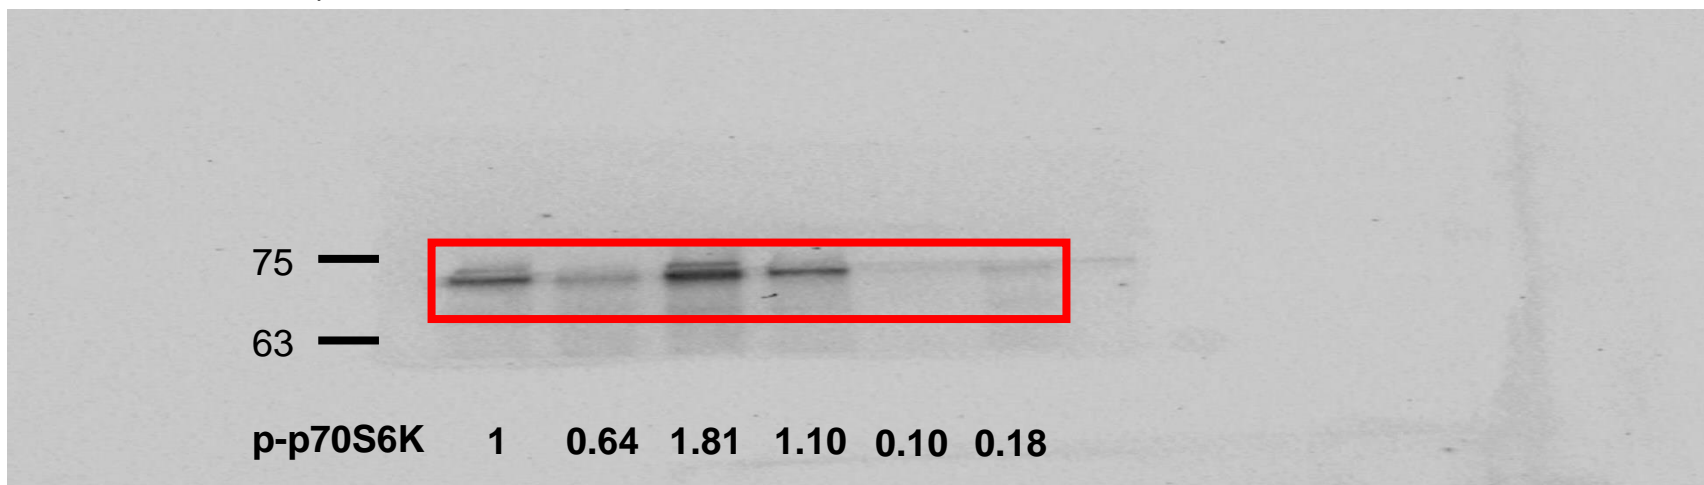

Fig. 4B Cis+Gem+PS\_beta actin (p-Class I PI3K, p-mTOR, p-70S6K)

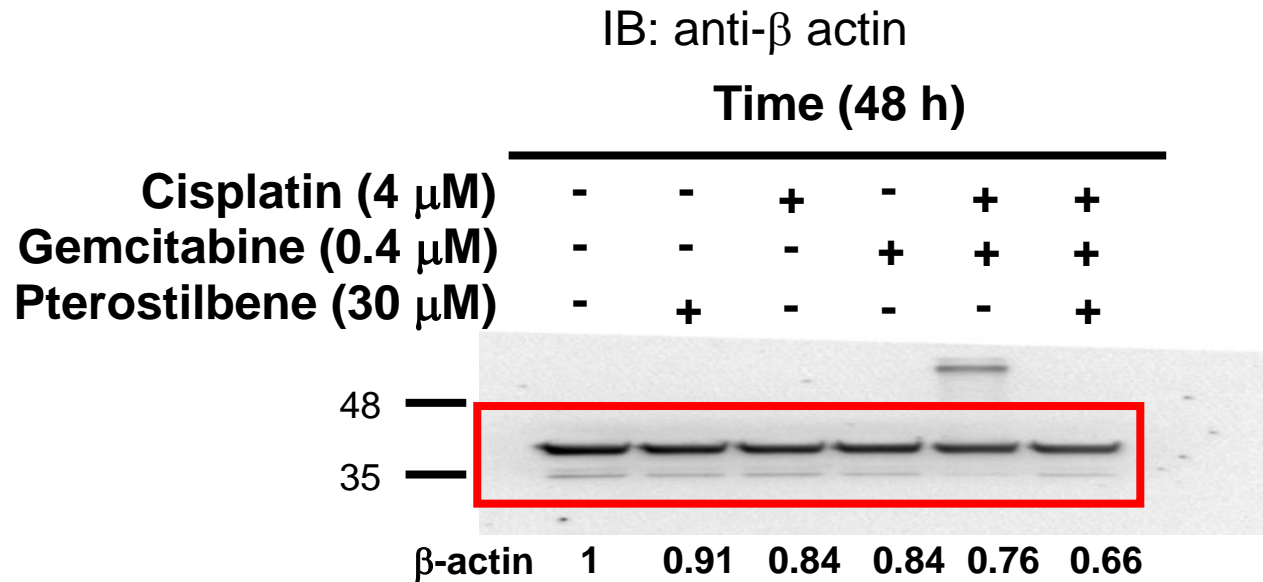

Fig. 4B Cis+Gem+PS\_p-MEK

IB: anti-p-MEK

Time (48 h)

|                                             |   |   |   |   |   |   |
|---------------------------------------------|---|---|---|---|---|---|
| <b>Cisplatin (4 <math>\mu</math>M)</b>      | - | - | + | - | + | + |
| <b>Gemcitabine (0.4 <math>\mu</math>M)</b>  | - | - | - | + | + | + |
| <b>Pterostilbene (30 <math>\mu</math>M)</b> | - | + | - | - | - | + |

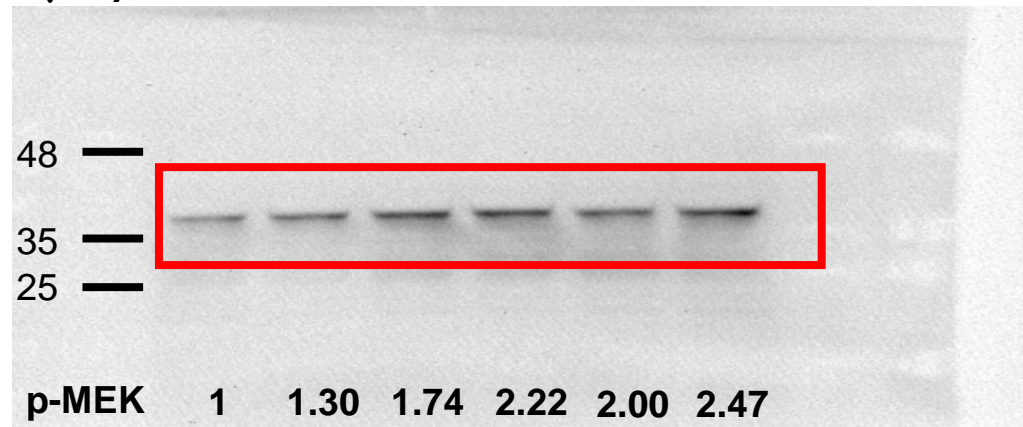

Fig. 4B Cis+Gem+PS\_p-ERK

IB: anti-p-ERK

Time (48 h)

|                            |   |   |   |   |   |   |
|----------------------------|---|---|---|---|---|---|
| Cisplatin (4 $\mu$ M)      | - | - | + | - | + | + |
| Gemcitabine (0.4 $\mu$ M)  | - | - | - | + | + | + |
| Pterostilbene (30 $\mu$ M) | - | + | - | - | - | + |

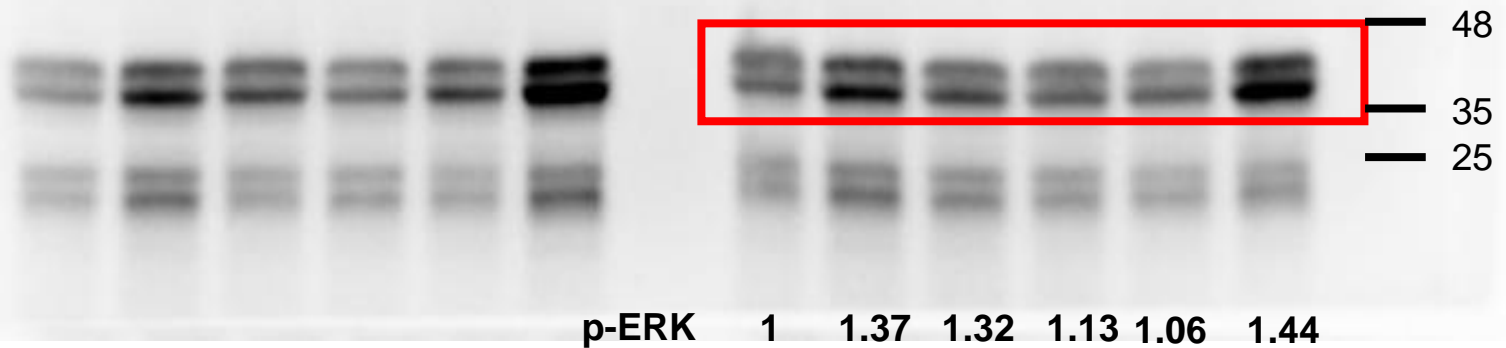

Fig. 4B Cis+Gem+PS\_beta actin (p-MEK, p-ERK)

IB: anti- $\beta$  actin

Time (48 h)

|                            |   |   |   |   |   |   |
|----------------------------|---|---|---|---|---|---|
| Cisplatin (4 $\mu$ M)      | - | - | + | - | + | + |
| Gemcitabine (0.4 $\mu$ M)  | - | - | - | + | + | + |
| Pterostilbene (30 $\mu$ M) | - | + | - | - | - | + |

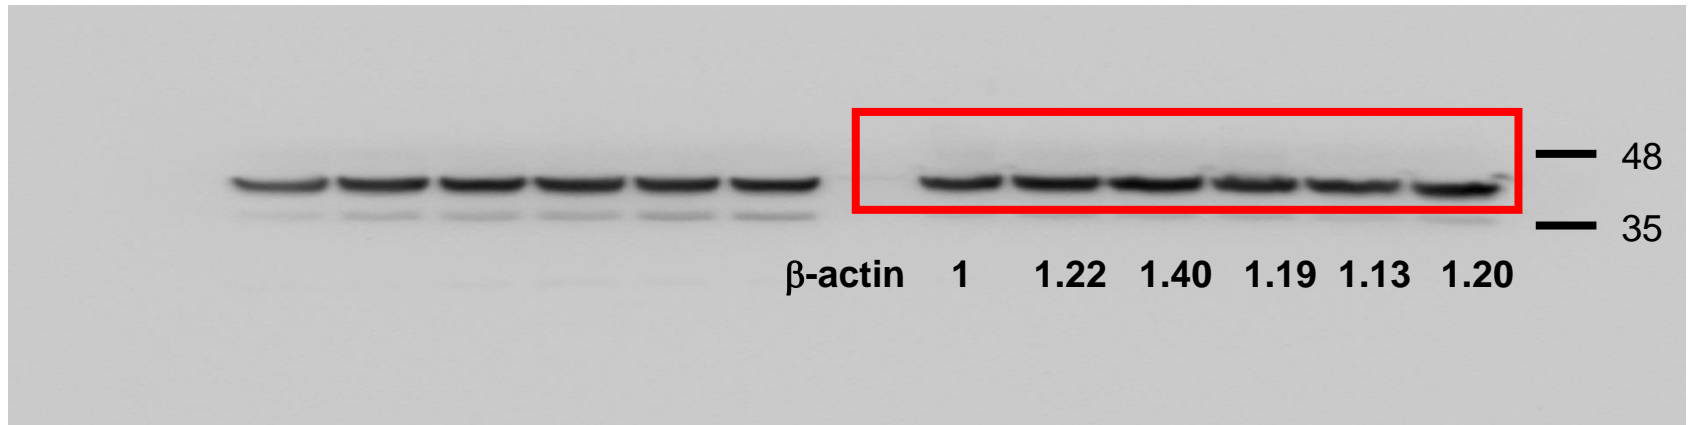

Fig. 4B Car+Gem+PS\_p-Class I PI3K

IB: anti-Class III PI3K

Time (48 h)

|                                             |   |   |   |   |   |   |
|---------------------------------------------|---|---|---|---|---|---|
| <b>Carboplatin (40 <math>\mu</math>M)</b>   | - | - | + | - | + | + |
| <b>Gemcitabine (0.4 <math>\mu</math>M)</b>  | - | - | - | + | + | + |
| <b>Pterostilbene (30 <math>\mu</math>M)</b> | - | + | - | - | - | + |

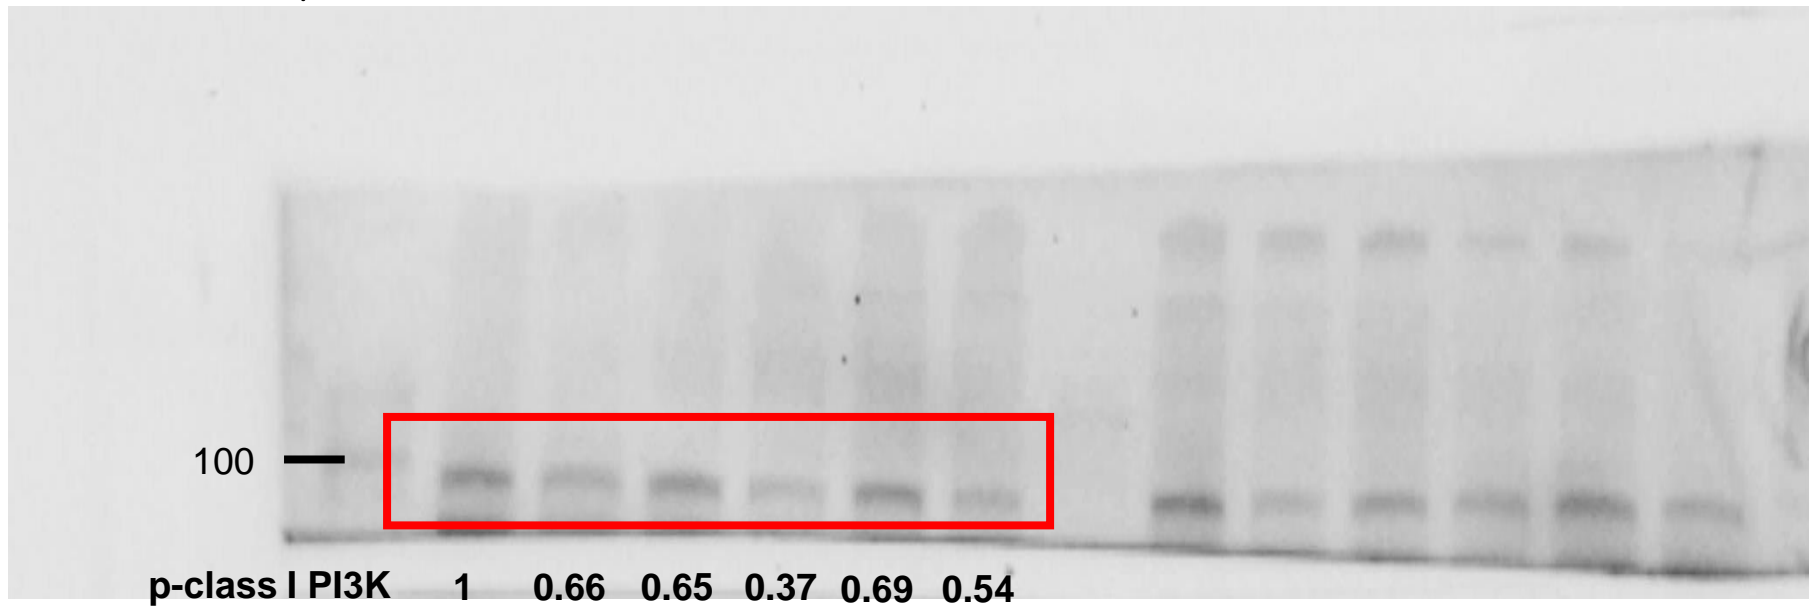

Fig. 4B Car+Gem+PS\_p-mTOR

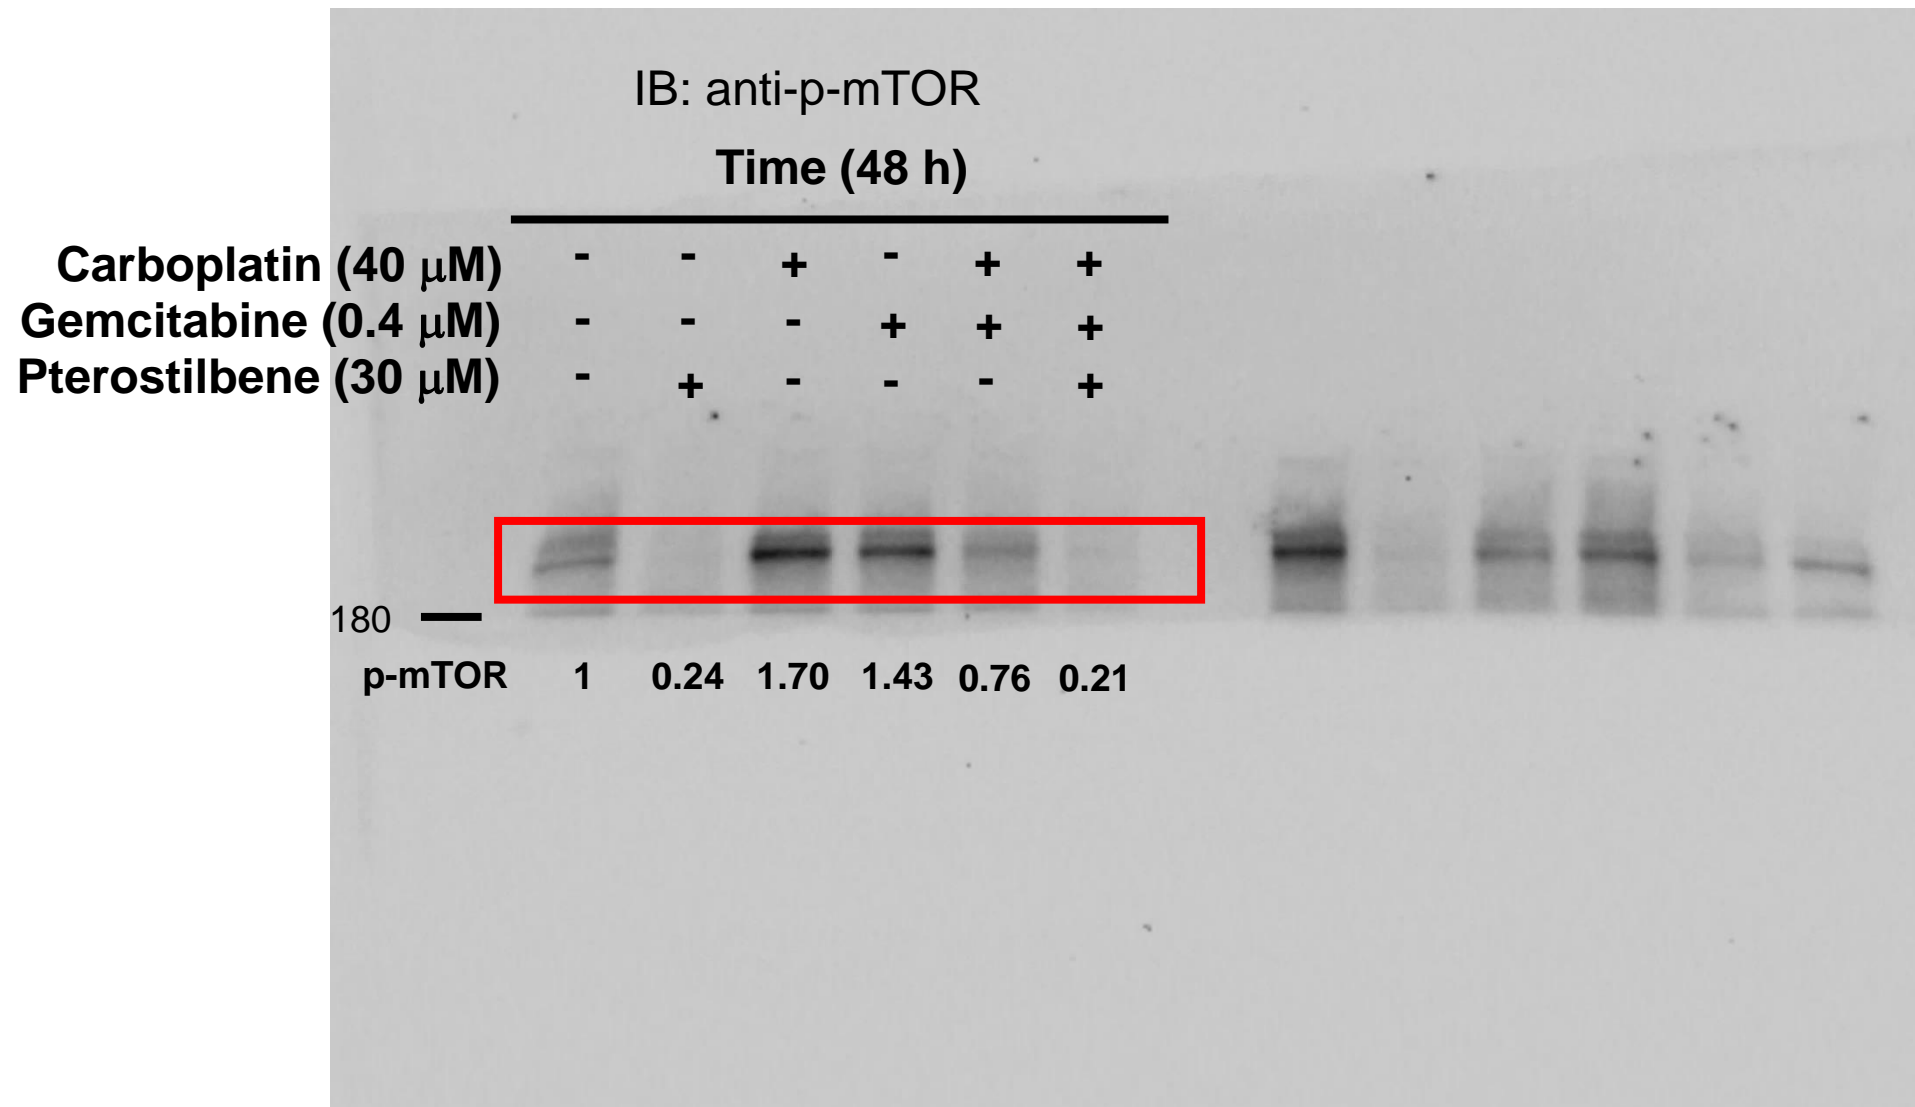

Fig. 4B Car+Gem+PS\_p-p70S6K

IB: anti-p-p70S6K

Time (48 h)

Carboplatin (40  $\mu$ M)

- - + - + +

Gemcitabine (0.4  $\mu$ M)

- - - + + +

Pterostilbene (30  $\mu$ M)

- + - - - +

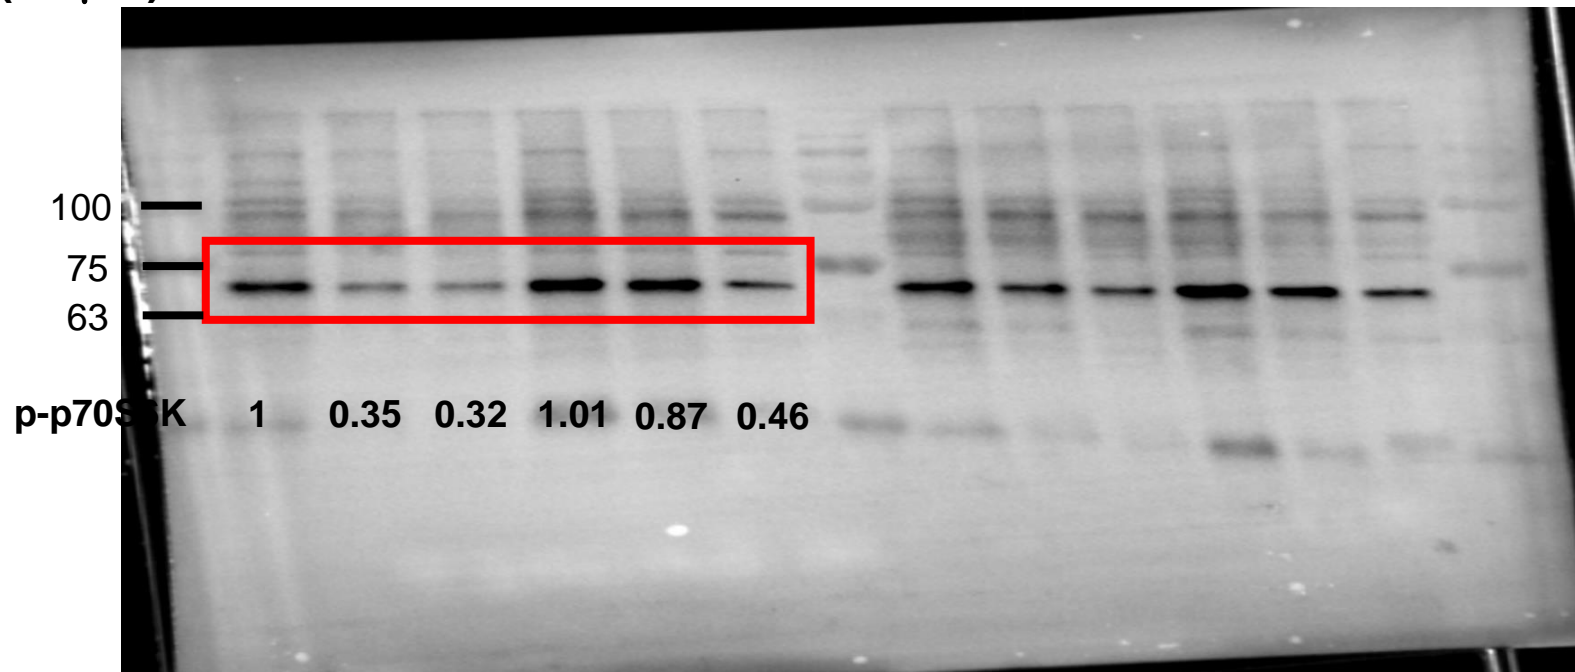



Fig. 4B Car+Gem+PS\_beta actin (p-Class I PI3K, p-mTOR, p-70S6K)

IB: anti- $\beta$  actin

Time (48 h)

|                            |   |   |   |   |   |   |
|----------------------------|---|---|---|---|---|---|
| Carboplatin (40 $\mu$ M)   | - | - | + | - | + | + |
| Gemcitabine (0.4 $\mu$ M)  | - | - | - | + | + | + |
| Pterostilbene (30 $\mu$ M) | - | + | - | - | - | + |

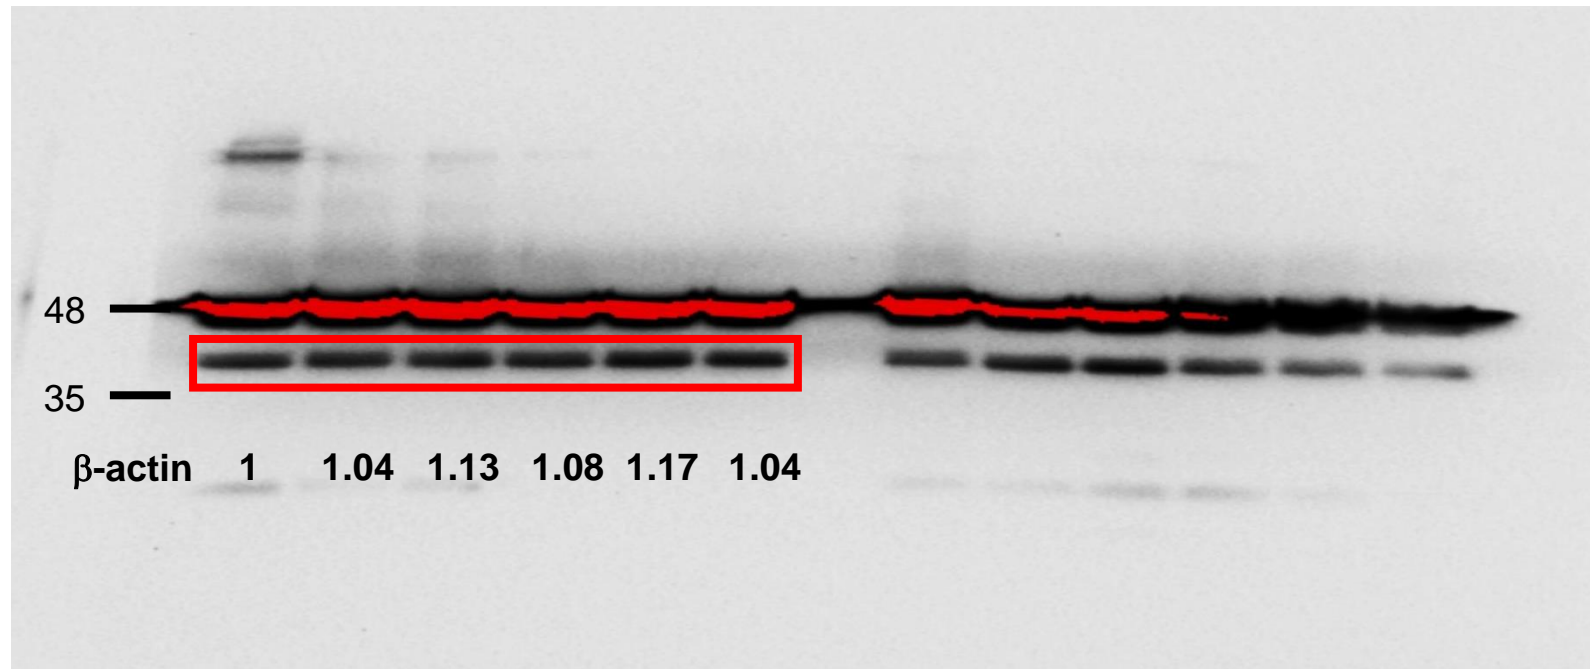

Fig. 4B Car+Gem+PS\_p-MEK

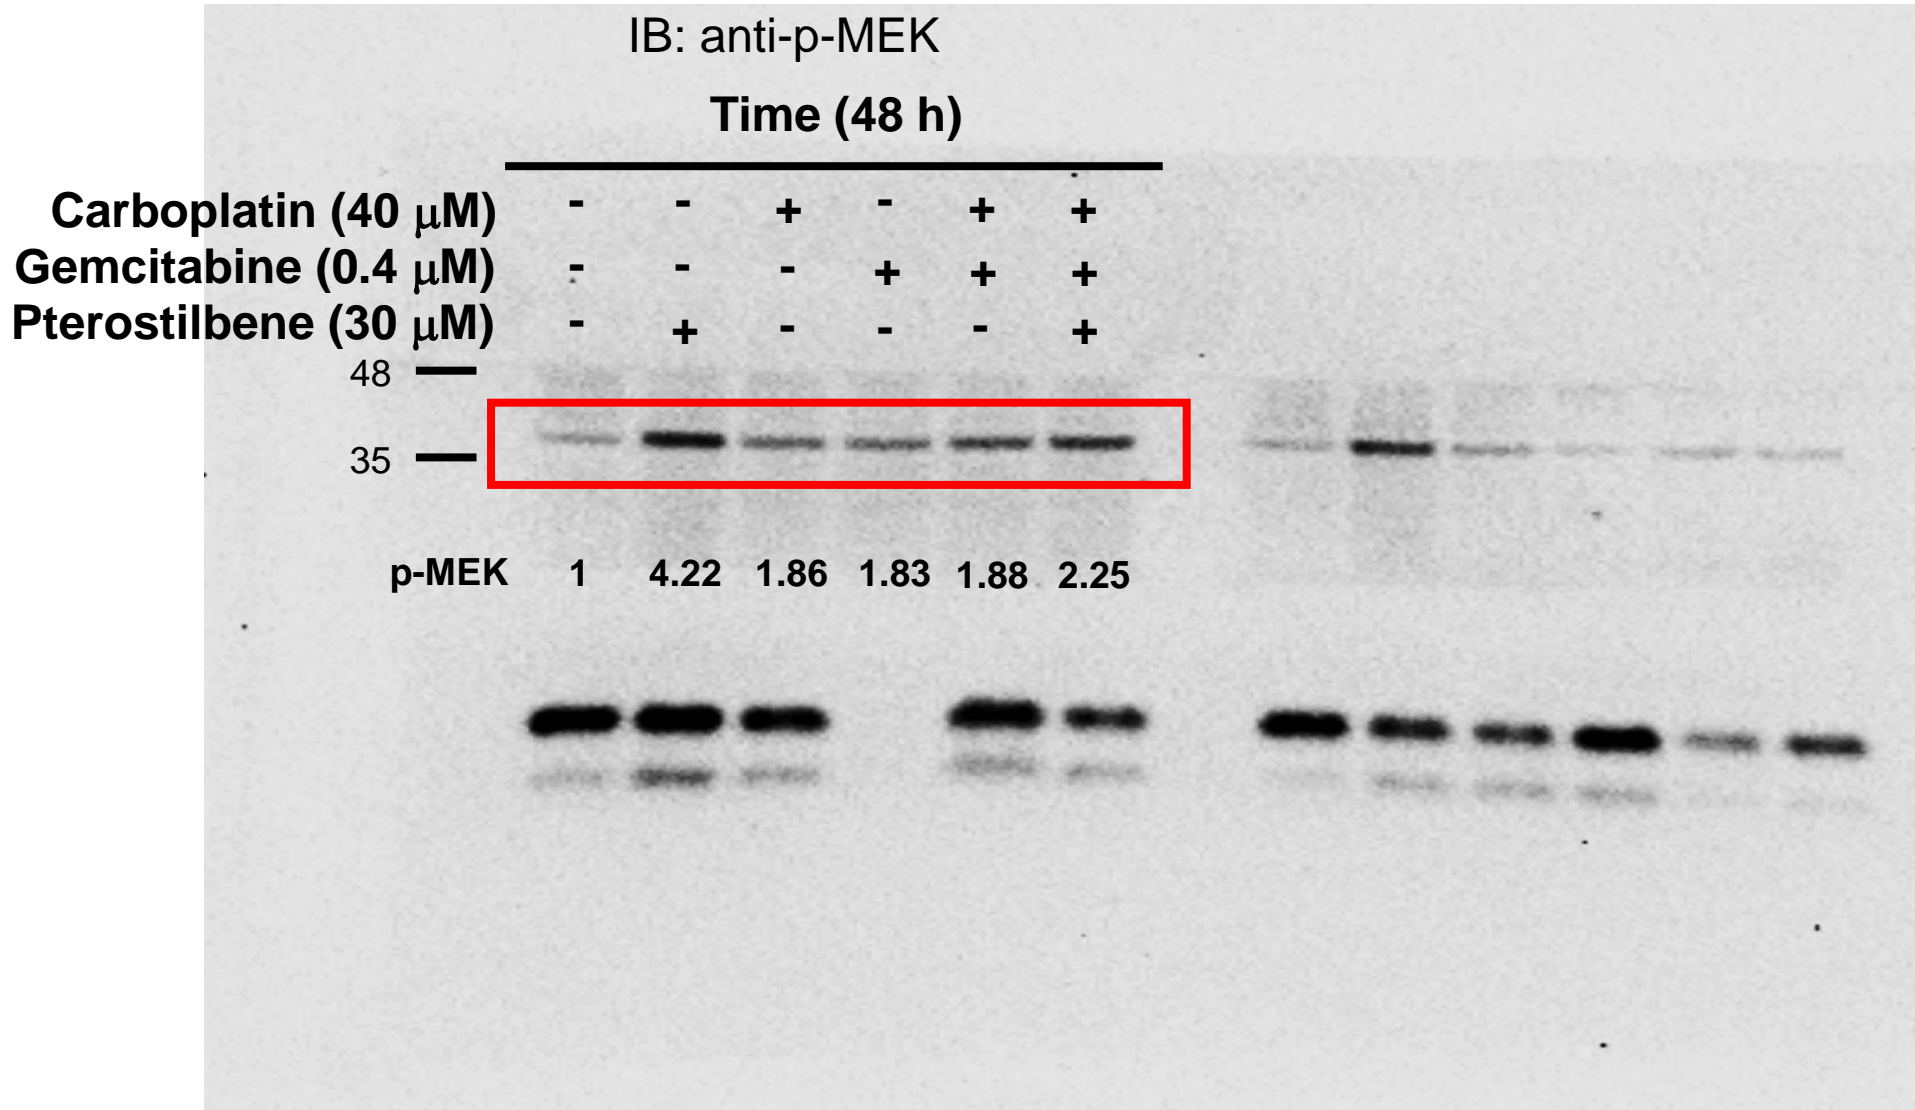

Fig. 4B Car+Gem+PS\_p-ERK

IB: anti-p-ERK

Time (48 h)

|                            |   |   |   |   |   |   |
|----------------------------|---|---|---|---|---|---|
| Carboplatin (40 $\mu$ M)   | - | - | + | - | + | + |
| Gemcitabine (0.4 $\mu$ M)  | - | - | - | + | + | + |
| Pterostilbene (30 $\mu$ M) | - | + | - | - | - | + |

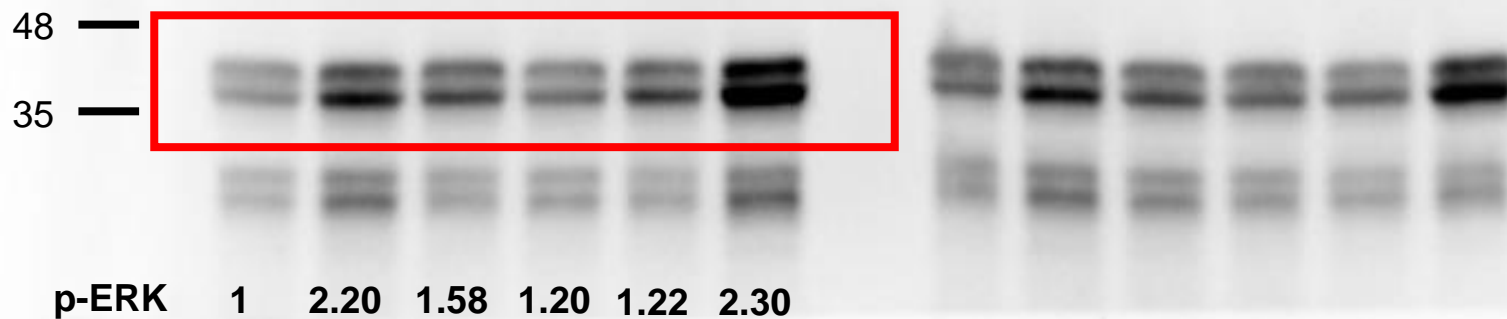

Fig. 4B Car+Gem+PS\_beta actin (p-MEK, p-ERK)

IB: anti- $\beta$  actin

Time (48 h)

|                            |   |   |   |   |   |   |
|----------------------------|---|---|---|---|---|---|
| Carboplatin (40 $\mu$ M)   | - | - | + | - | + | + |
| Gemcitabine (0.4 $\mu$ M)  | - | - | - | + | + | + |
| Pterostilbene (30 $\mu$ M) | - | + | - | - | - | + |

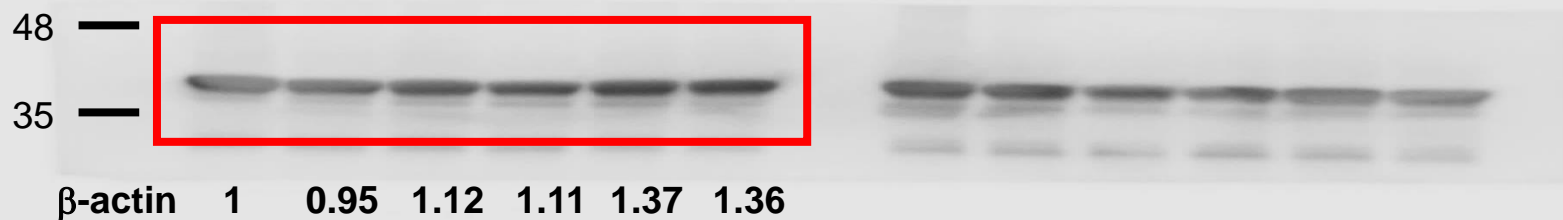

Fig. 5E Cis+Gem+PS\_Pan-Ras

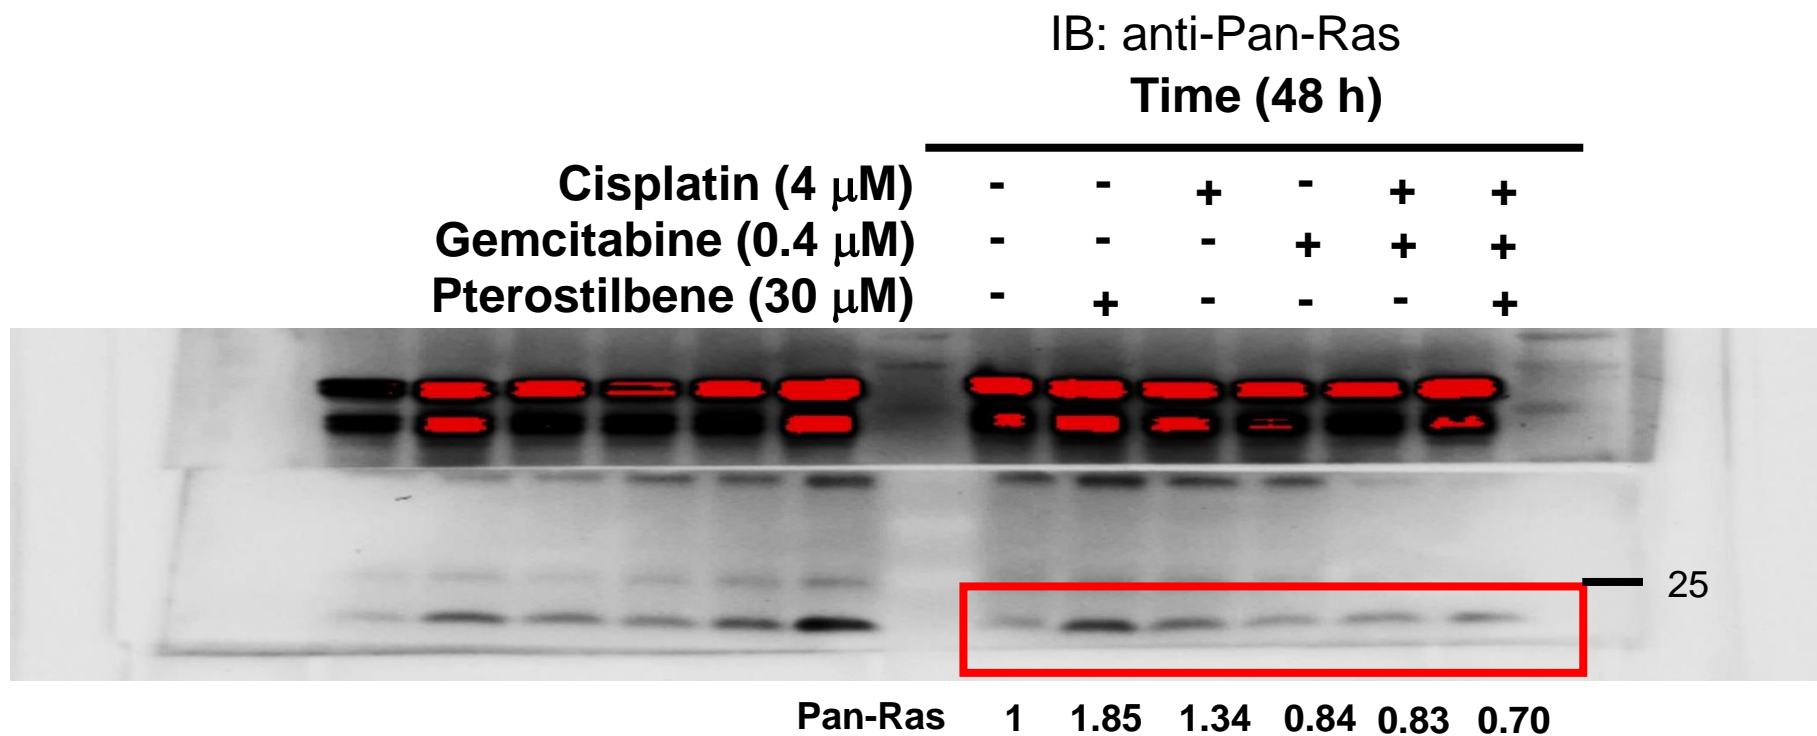

Fig. 5E Cis+Gem+PS\_p-RB

IB: anti-p-RB  
Time (48 h)

|                            |   |   |   |   |   |   |
|----------------------------|---|---|---|---|---|---|
| Cisplatin (4 $\mu$ M)      | - | - | + | - | + | + |
| Gemcitabine (0.4 $\mu$ M)  | - | - | - | + | + | + |
| Pterostilbene (30 $\mu$ M) | - | + | - | - | - | + |

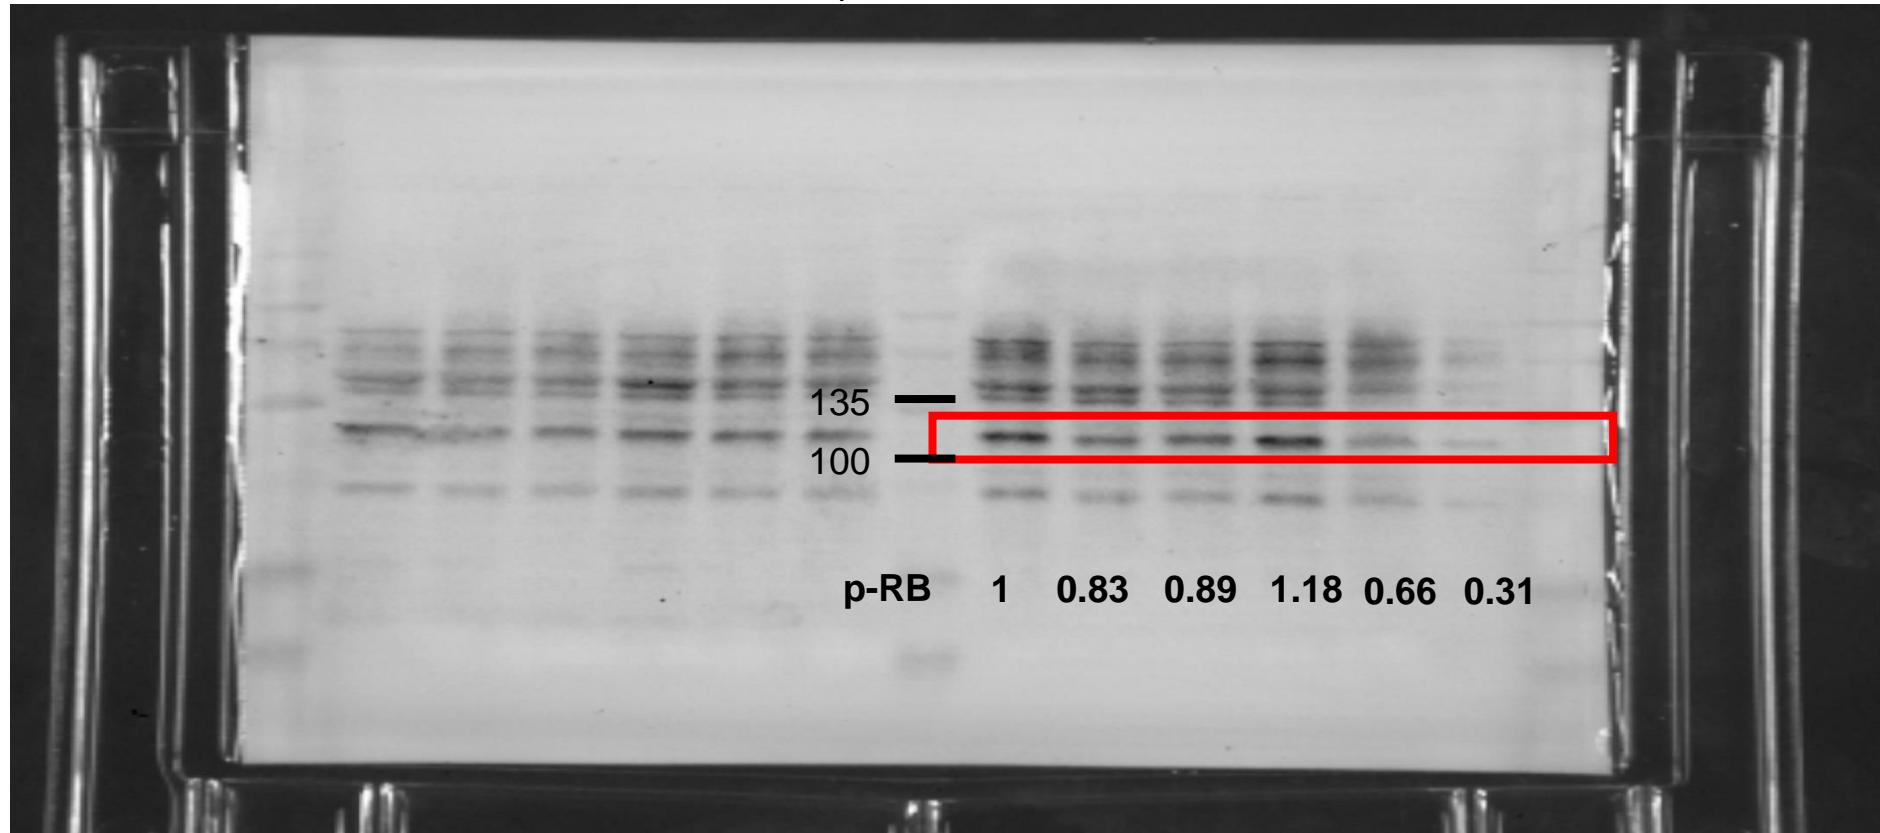

Fig. 5E Cis+Gem+PS\_beta actin (Pan-Ras, p-RB)

IB: anti- $\beta$  actin

Time (48 h)

| Cisplatin (4 $\mu$ M)      | - | - | + | - | + | + |
|----------------------------|---|---|---|---|---|---|
| Gemcitabine (0.4 $\mu$ M)  | - | - | - | + | + | + |
| Pterostilbene (30 $\mu$ M) | - | + | - | - | - | + |

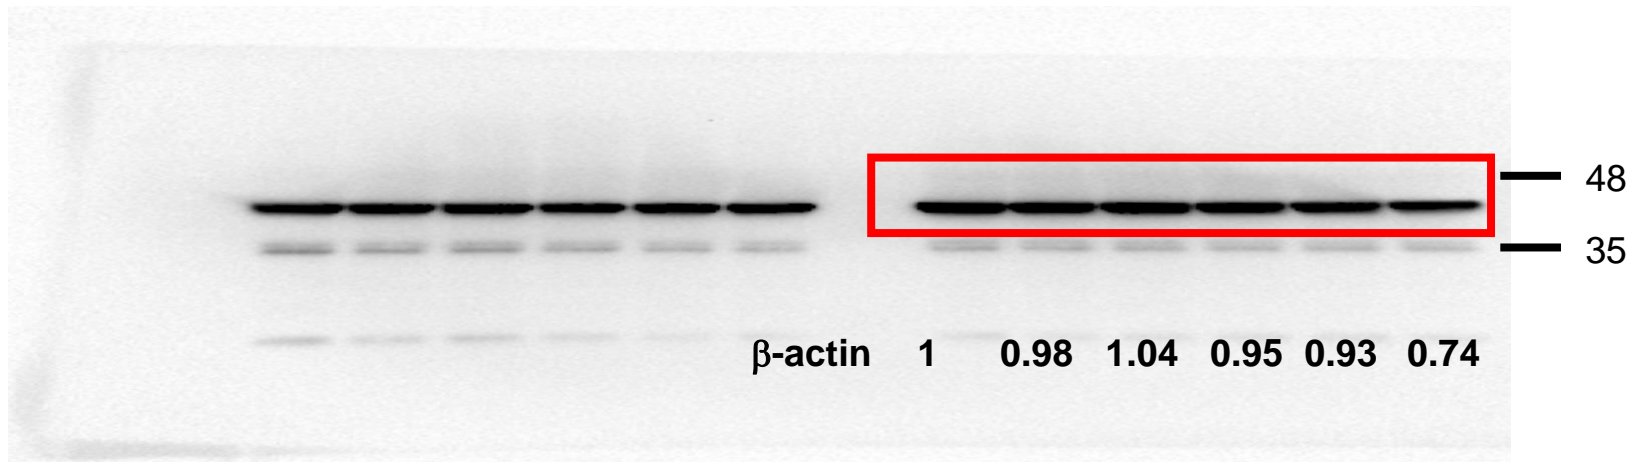



Fig. 5E Cis+Gem+PS\_p-Aurora A

IB: anti-p-Aurora A

Time (48 h)

|                            |   |   |   |   |   |   |
|----------------------------|---|---|---|---|---|---|
| Cisplatin (4 $\mu$ M)      | - | - | + | - | + | + |
| Gemcitabine (0.4 $\mu$ M)  | - | - | - | + | + | + |
| Pterostilbene (30 $\mu$ M) | - | + | - | - | - | + |

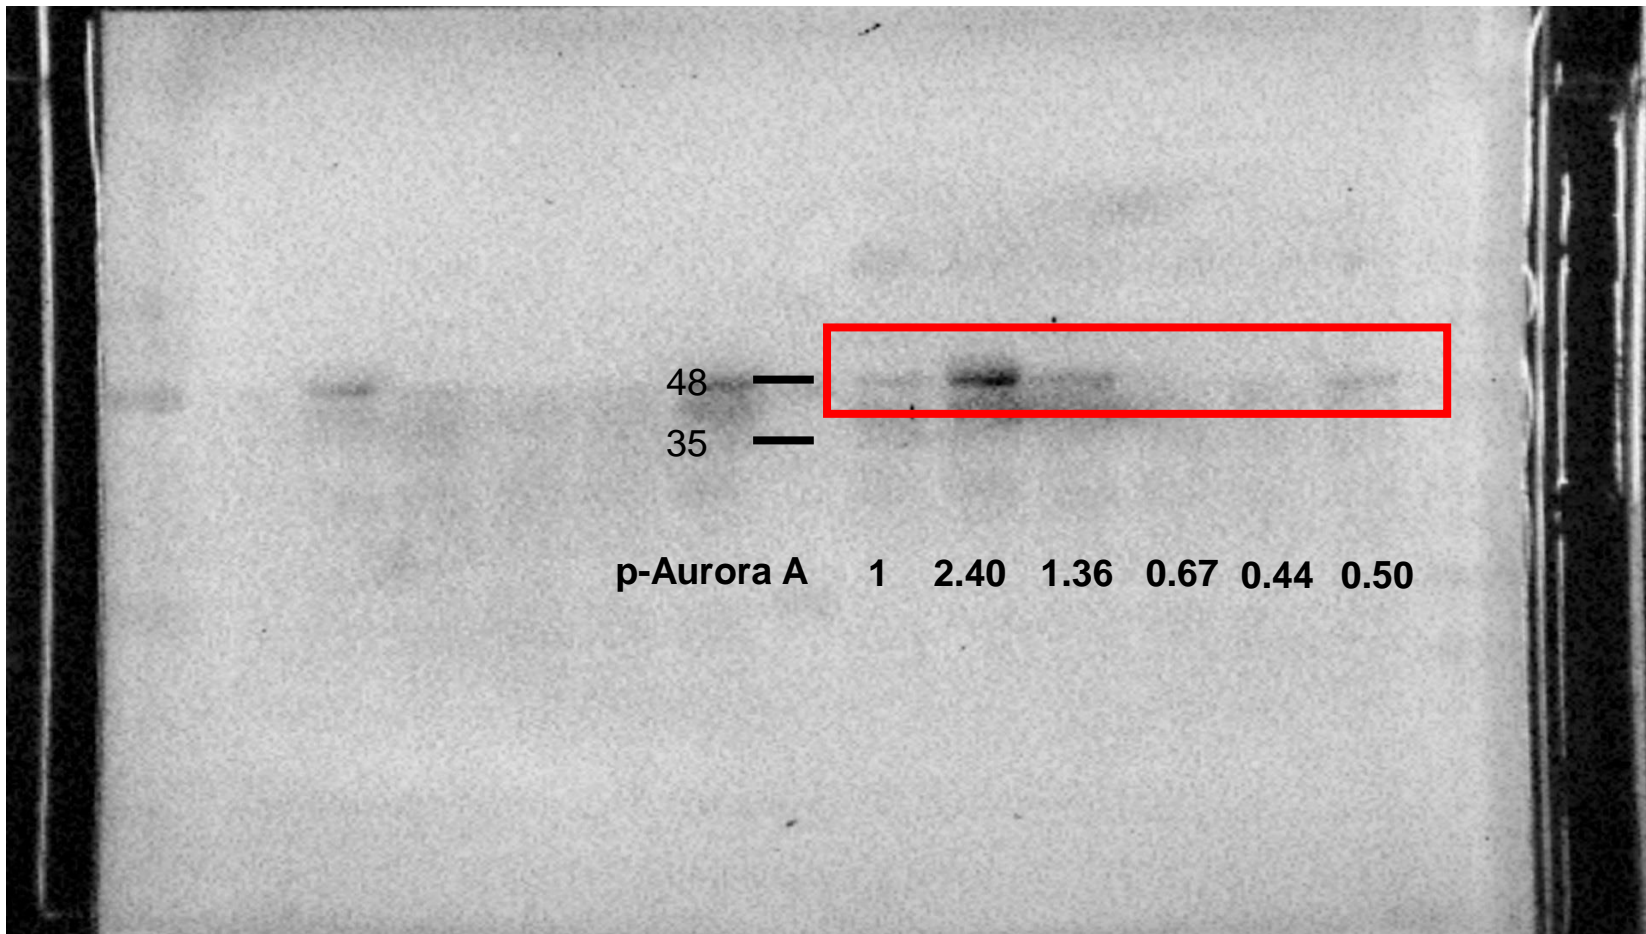



Fig. 5E Cis+Gem+PS\_beta actin (p-Aurora A)

IB: anti- $\beta$  actin

Time (48 h)

|                            |   |   |   |   |   |   |
|----------------------------|---|---|---|---|---|---|
| Cisplatin (4 $\mu$ M)      | - | - | + | - | + | + |
| Gemcitabine (0.4 $\mu$ M)  | - | - | - | + | + | + |
| Pterostilbene (30 $\mu$ M) | - | + | - | - | - | + |

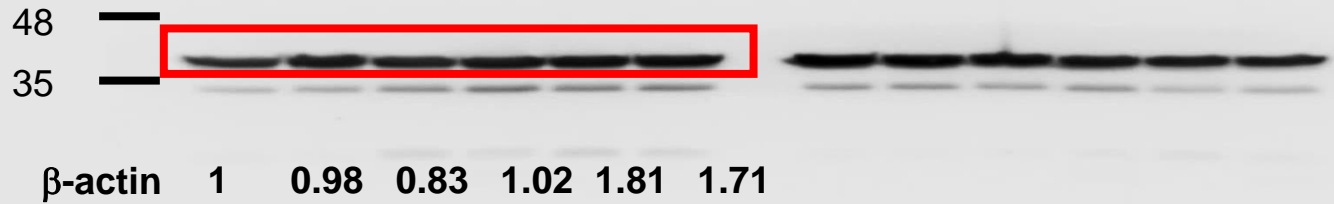

Fig. 5E Car+Gem+PS\_Pan-Ras

IB: anti-Pan Ras

Time (48 h)

|                            |   |   |   |   |   |   |
|----------------------------|---|---|---|---|---|---|
| Carboplatin (40 $\mu$ M)   | - | - | + | - | + | + |
| Gemcitabine (0.4 $\mu$ M)  | - | - | - | + | + | + |
| Pterostilbene (30 $\mu$ M) | - | + | - | - | - | + |

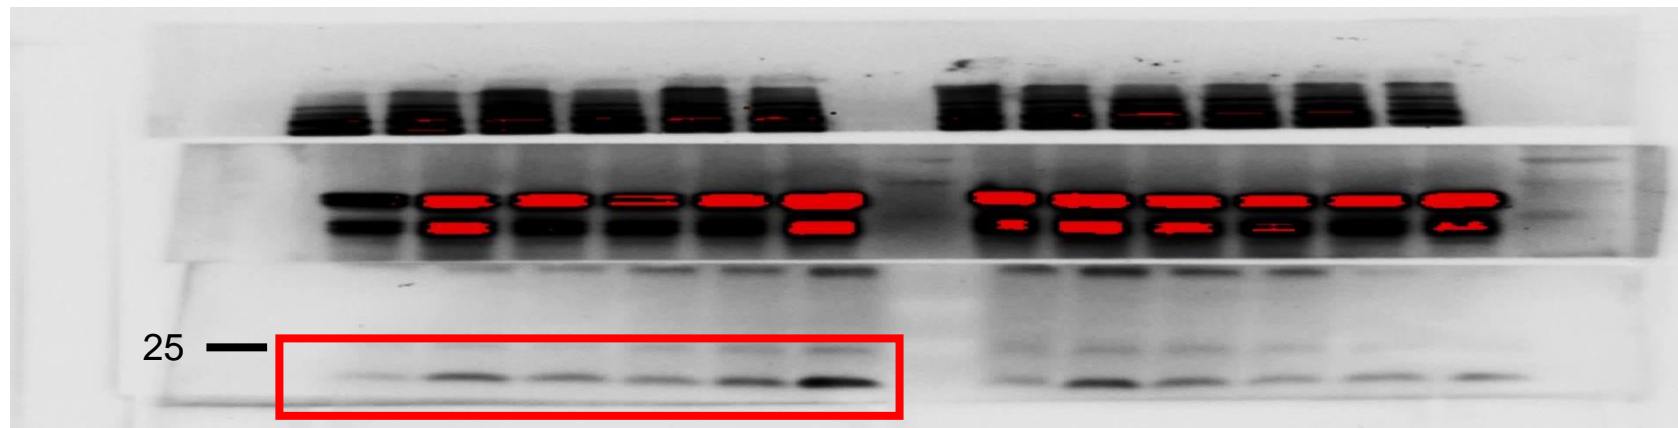

Pan-Ras 1 2.08 2.42 3.34 3.13 3.63

Fig. 5E Car+Gem+PS\_p-RB  
IB: anti-p-RB

Time (48 h)

|                            |   |   |   |   |   |   |
|----------------------------|---|---|---|---|---|---|
| Carboplatin (40 $\mu$ M)   | - | - | + | - | + | + |
| Gemcitabine (0.4 $\mu$ M)  | - | - | - | + | + | + |
| Pterostilbene (30 $\mu$ M) | - | + | - | - | - | + |

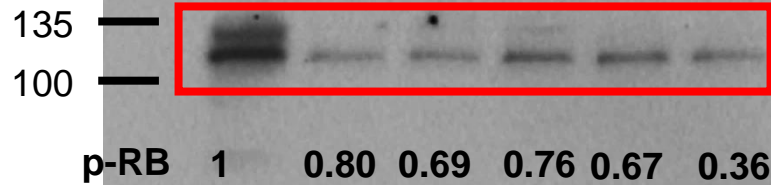

Fig. 5E Car+Gem+PS\_beta actin (Pan-Ras, p-RB)

IB: anti- $\beta$  actin

Time (48 h)

Carboplatin (40  $\mu$ M)

- - + - + +

Gemcitabine (0.4  $\mu$ M)

- - - + + +

Pterostilbene (30  $\mu$ M)

- + - - - +

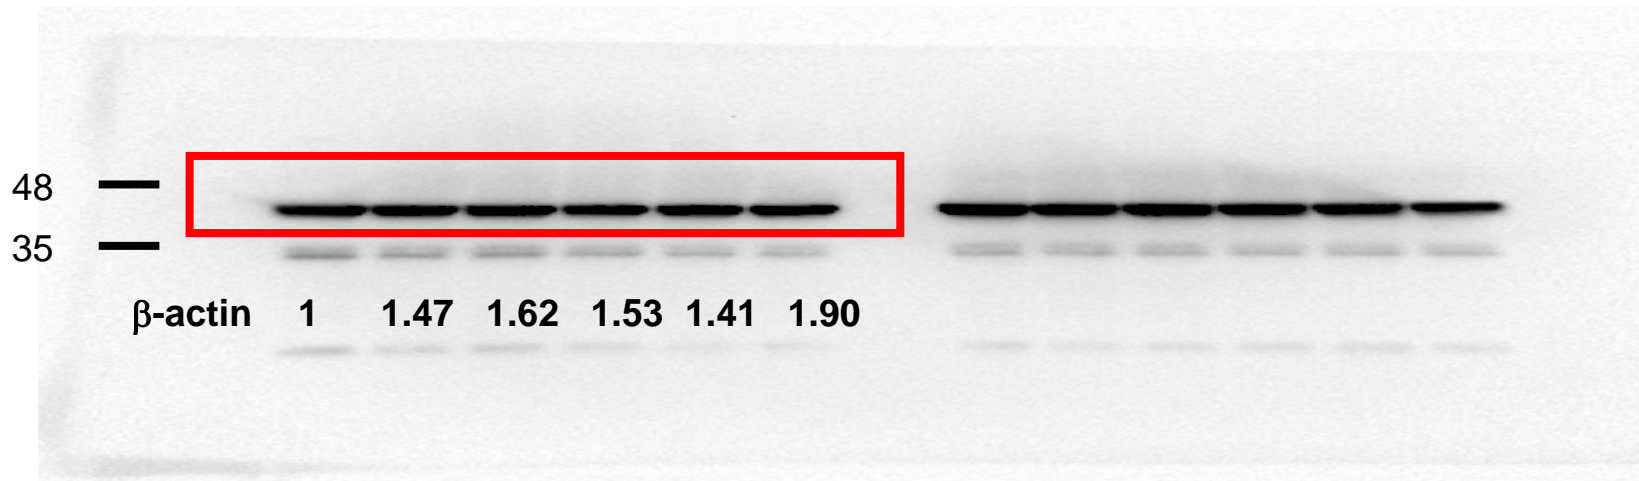

Fig. 5E Car+Gem+PS\_p-Aurora A

IB: anti-p-Aurora A

Time (48 h)

|                            |   |   |   |   |   |   |
|----------------------------|---|---|---|---|---|---|
| Carboplatin (40 $\mu$ M)   | - | - | + | - | + | + |
| Gemcitabine (0.4 $\mu$ M)  | - | - | - | + | + | + |
| Pterostilbene (30 $\mu$ M) | - | + | - | - | - | + |

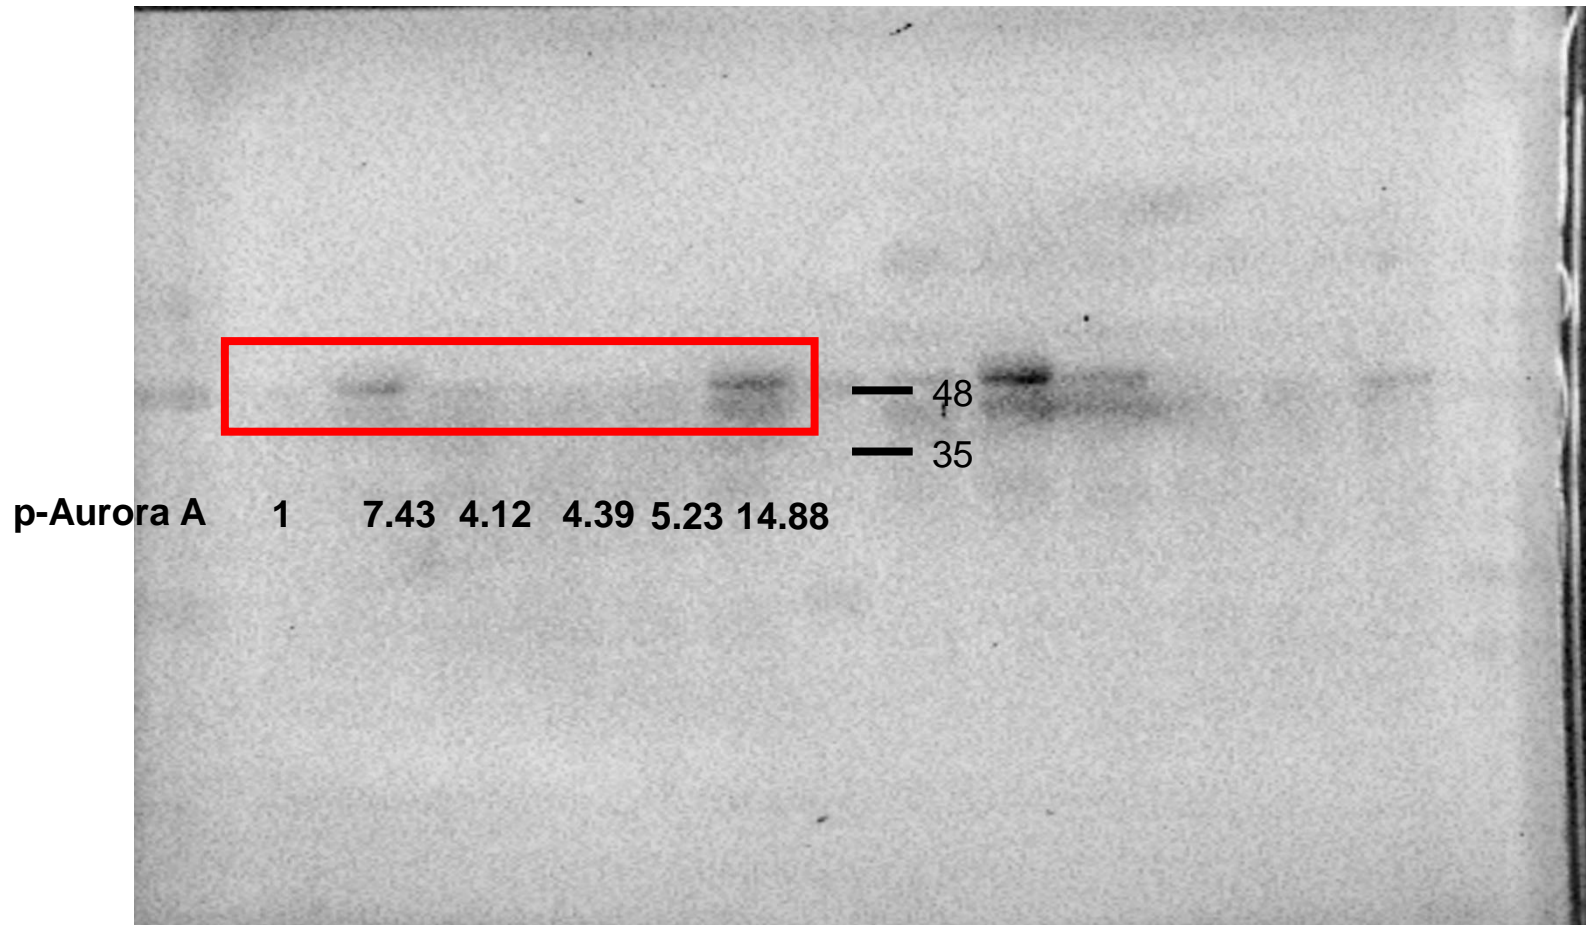

Fig. 5E Car+Gem+PS\_beta actin (p-Aurora A)

IB: anti- $\beta$  actin

Time (48 h)

| Carboplatin (40 $\mu$ M)   | - | - | + | - | + | + |
|----------------------------|---|---|---|---|---|---|
| Gemcitabine (0.4 $\mu$ M)  | - | - | - | + | + | + |
| Pterostilbene (30 $\mu$ M) | - | + | - | - | - | + |

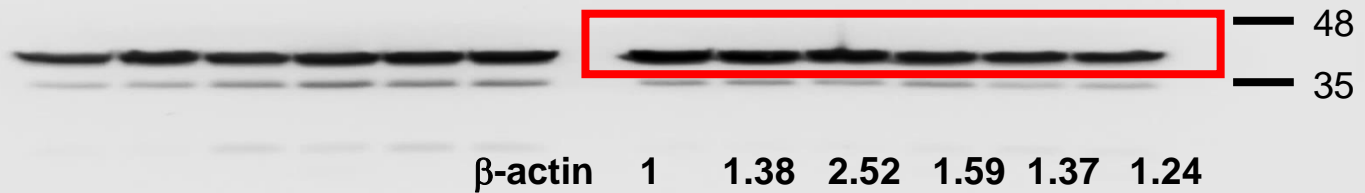

Fig. 6F tumor\_p-Class I PI3K

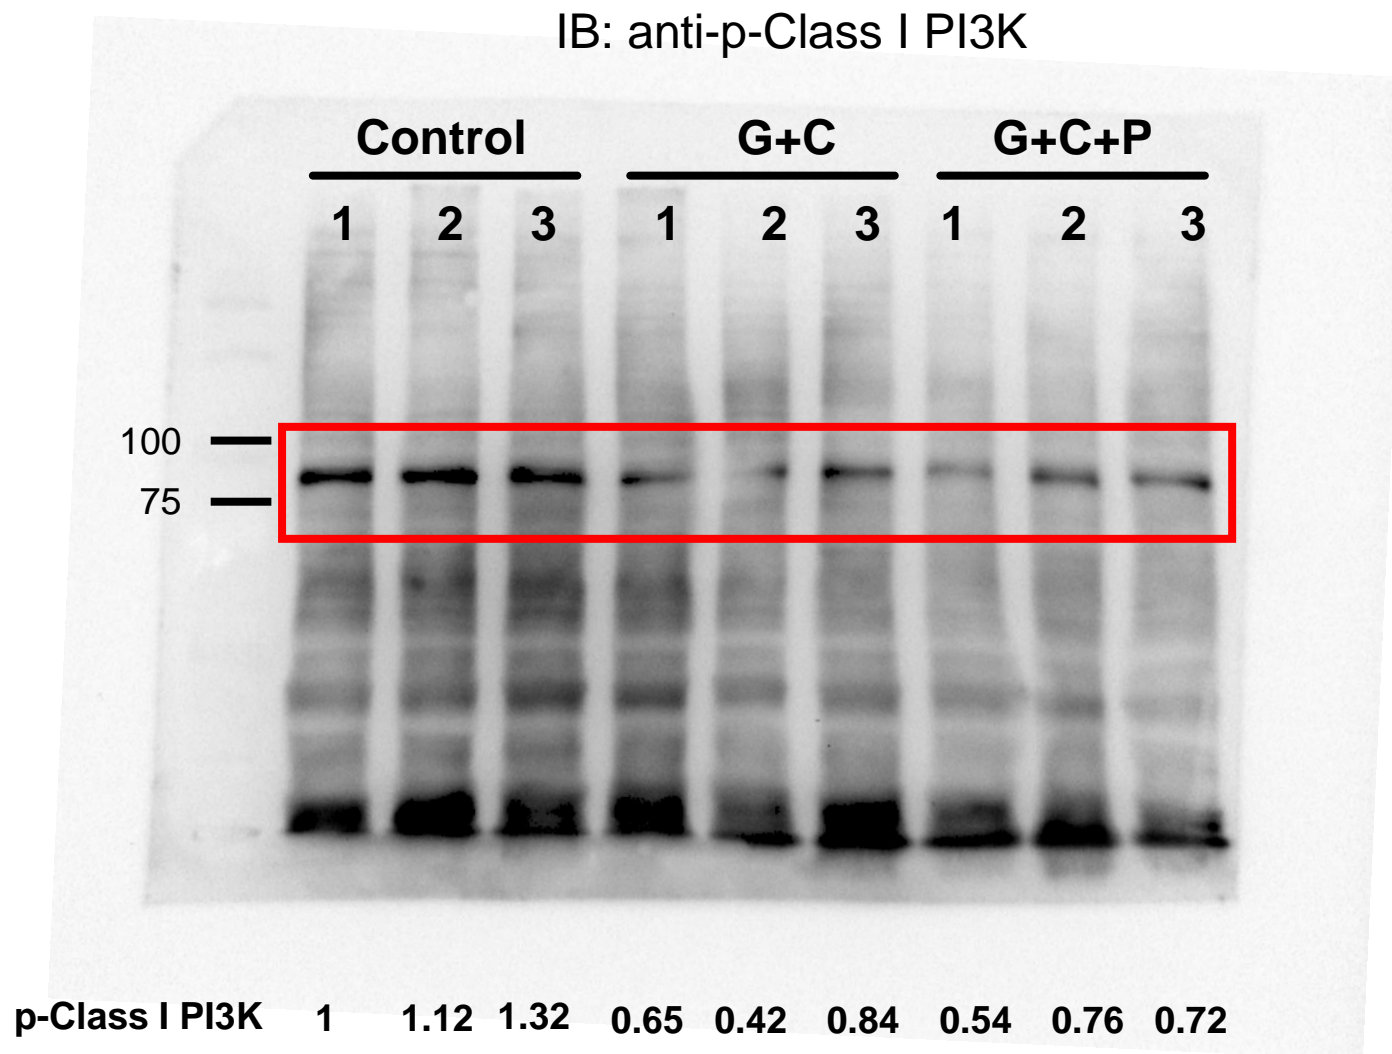



Fig. 6F tumor\_p-mTOR

IB: anti-p-mTOR

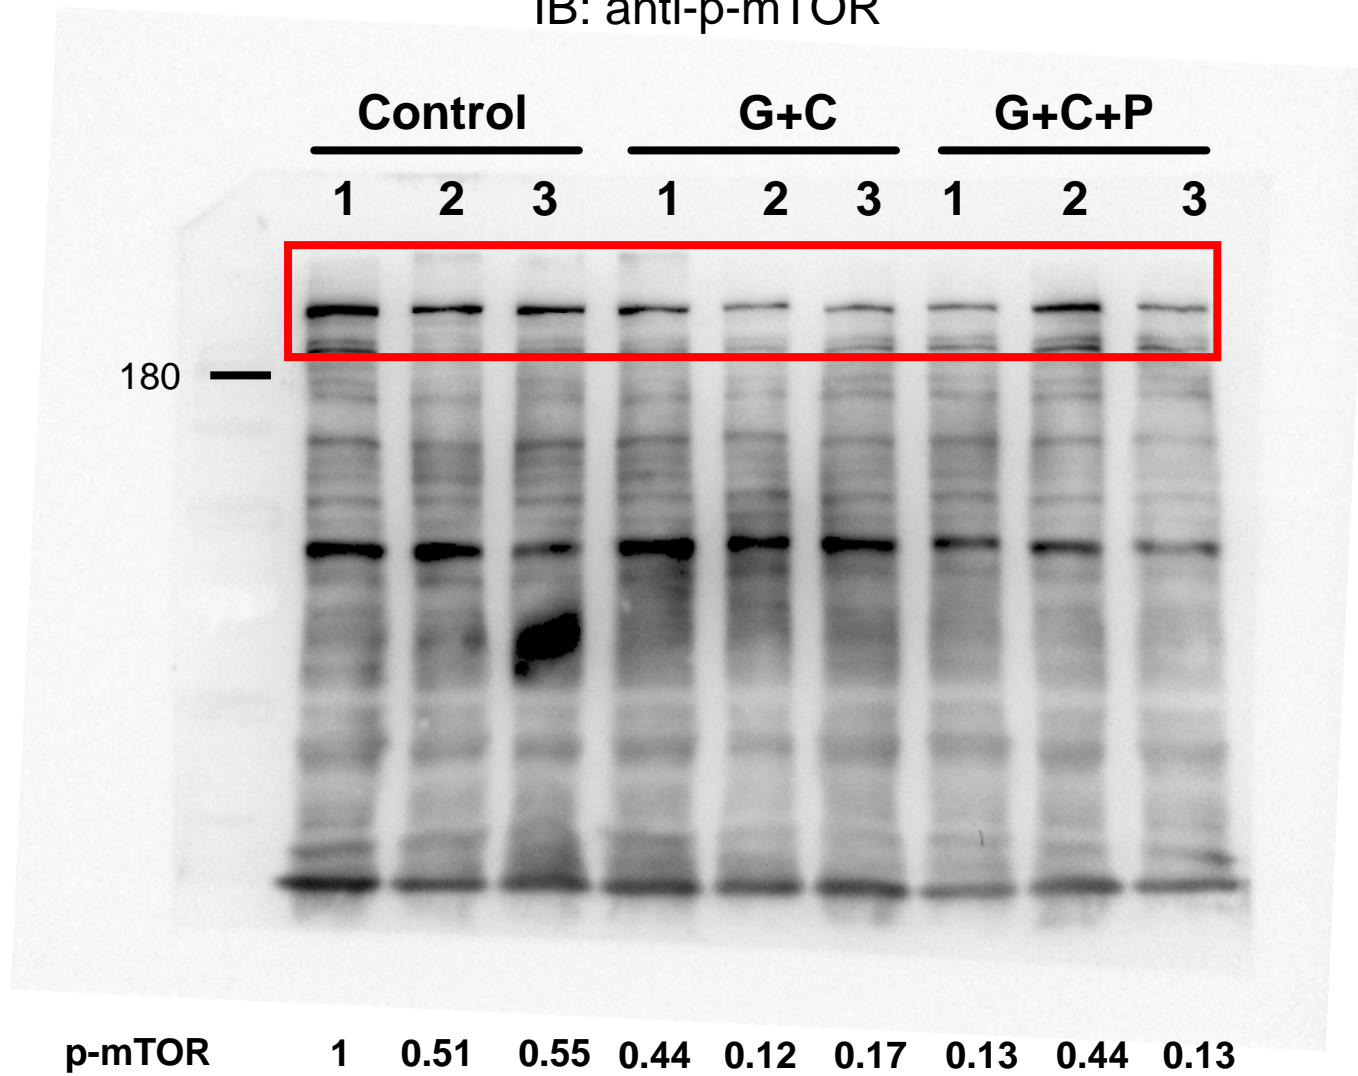



Fig. 6F tumor\_p-p70S6K

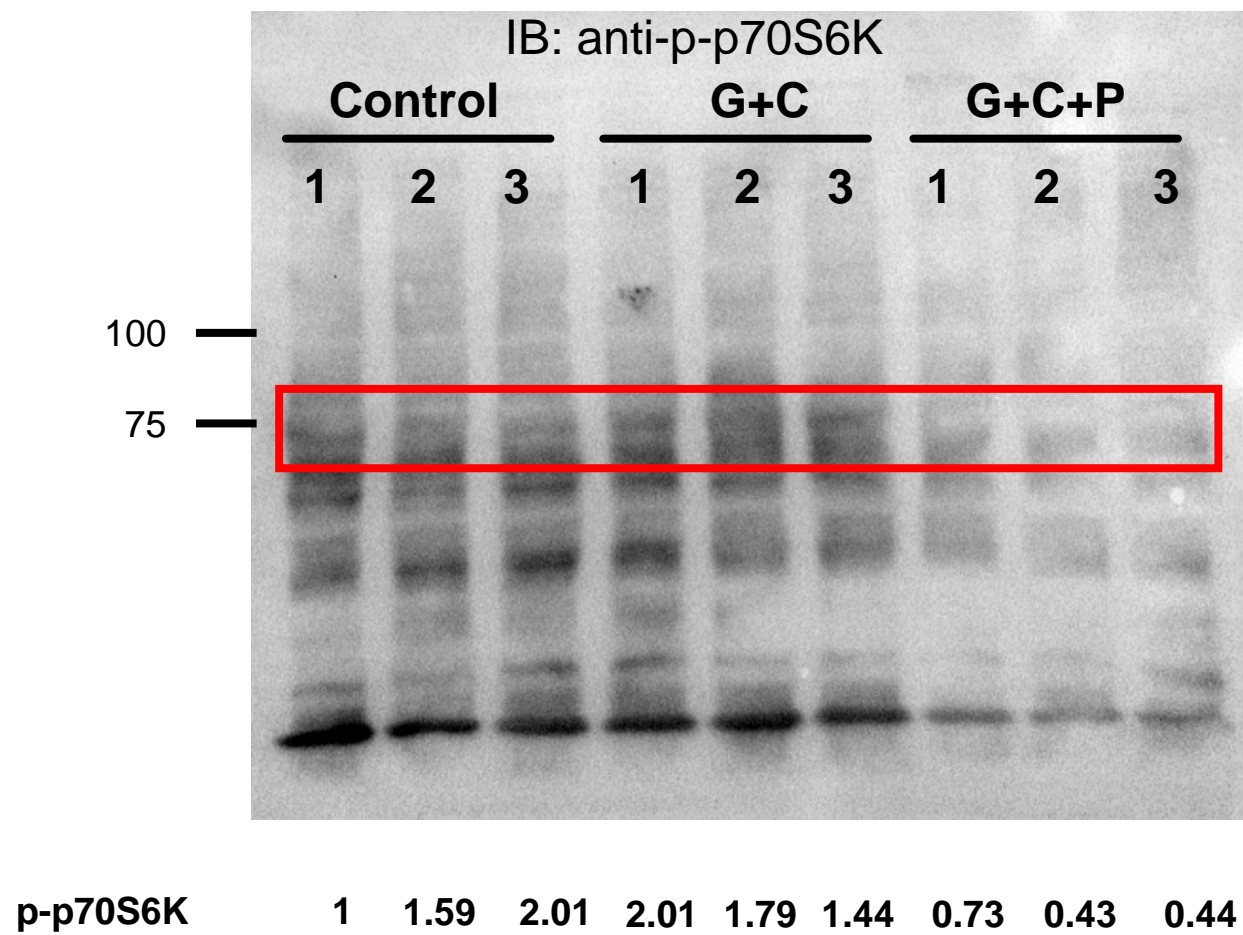

Fig. 6F tumor\_p-MEK

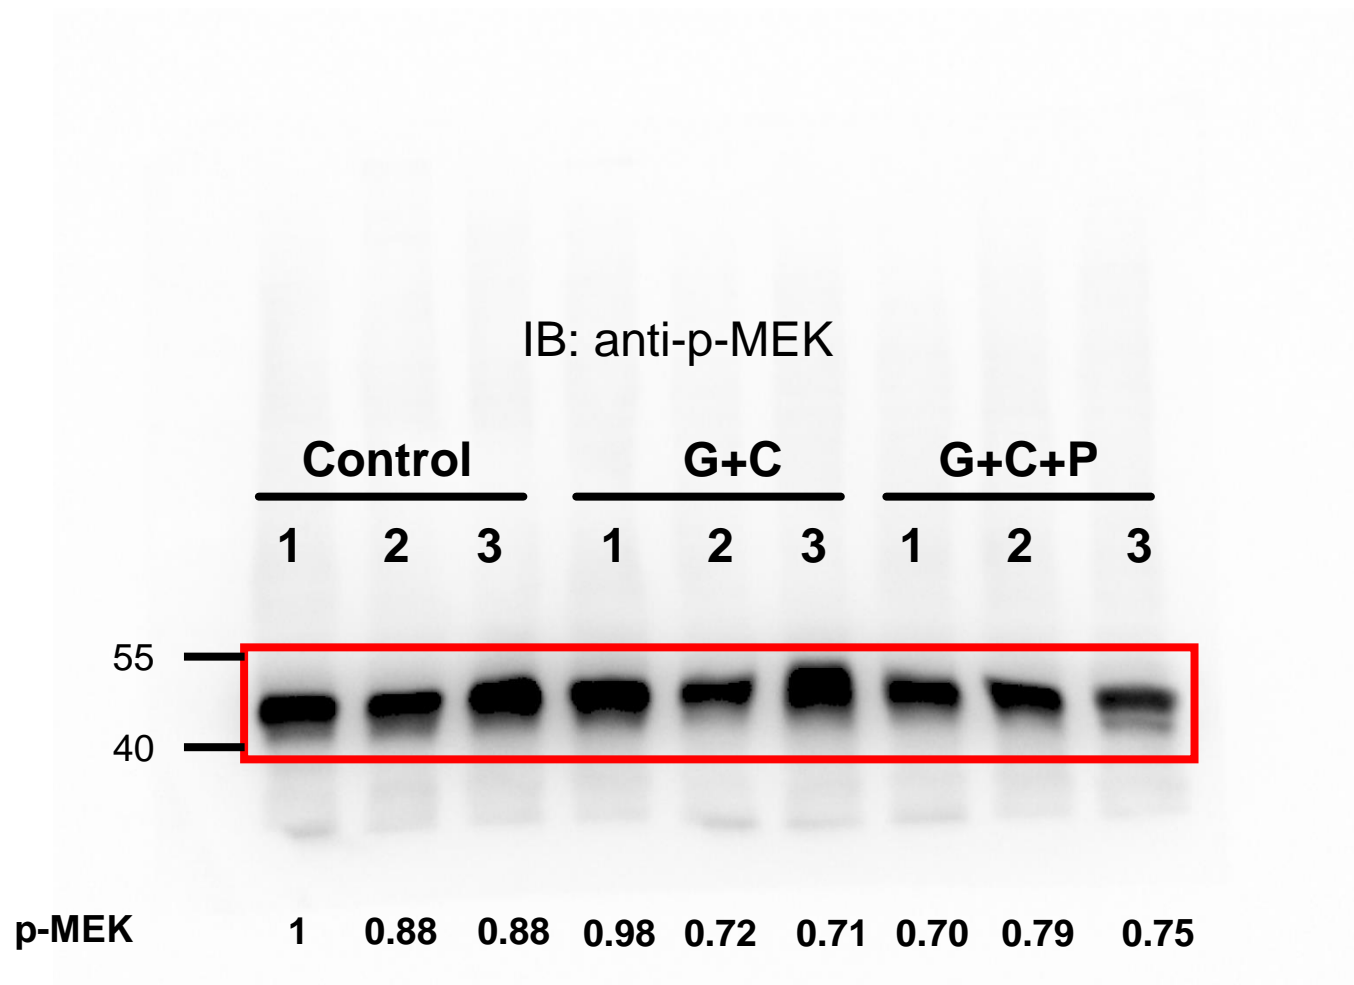

Fig. 6F tumor\_p-ERK

IB: anti-p-ERK

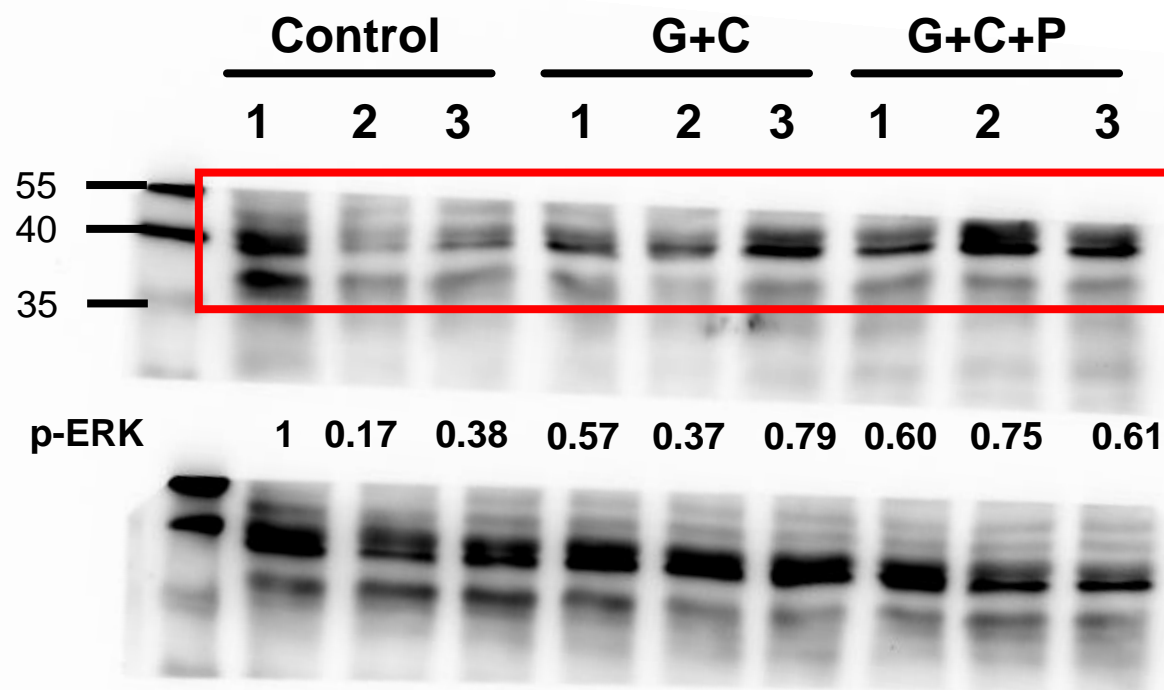

Fig.6F tumor\_beta actin

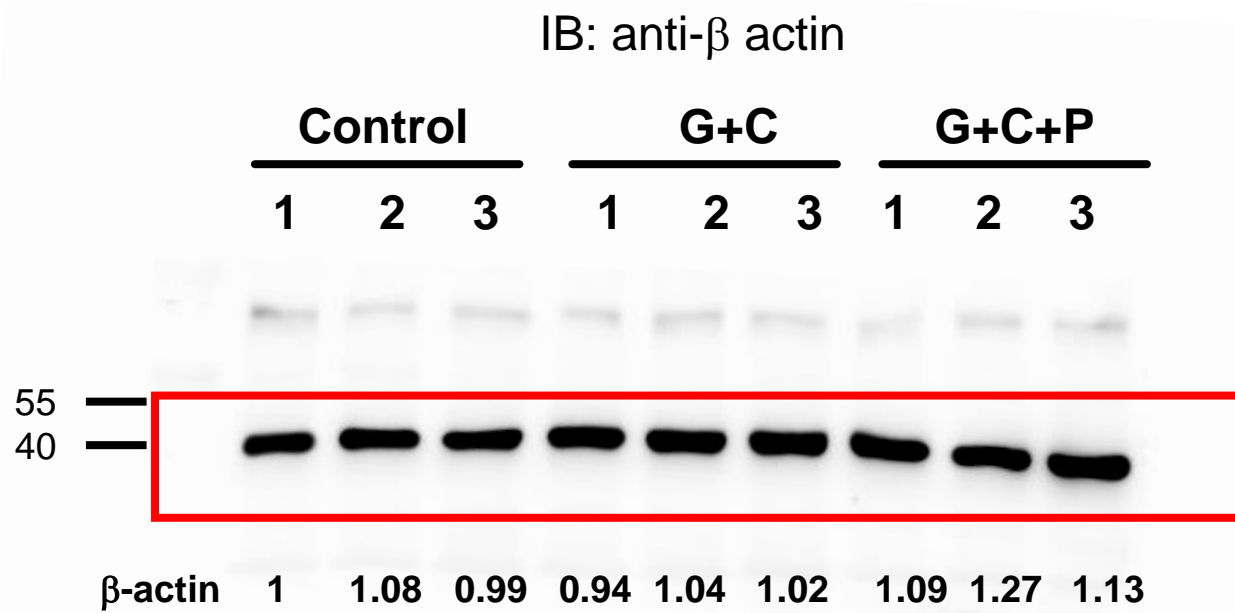

Fig. S8 T24, E7\_p-RB

IB: anti-p-RB

T24   E7

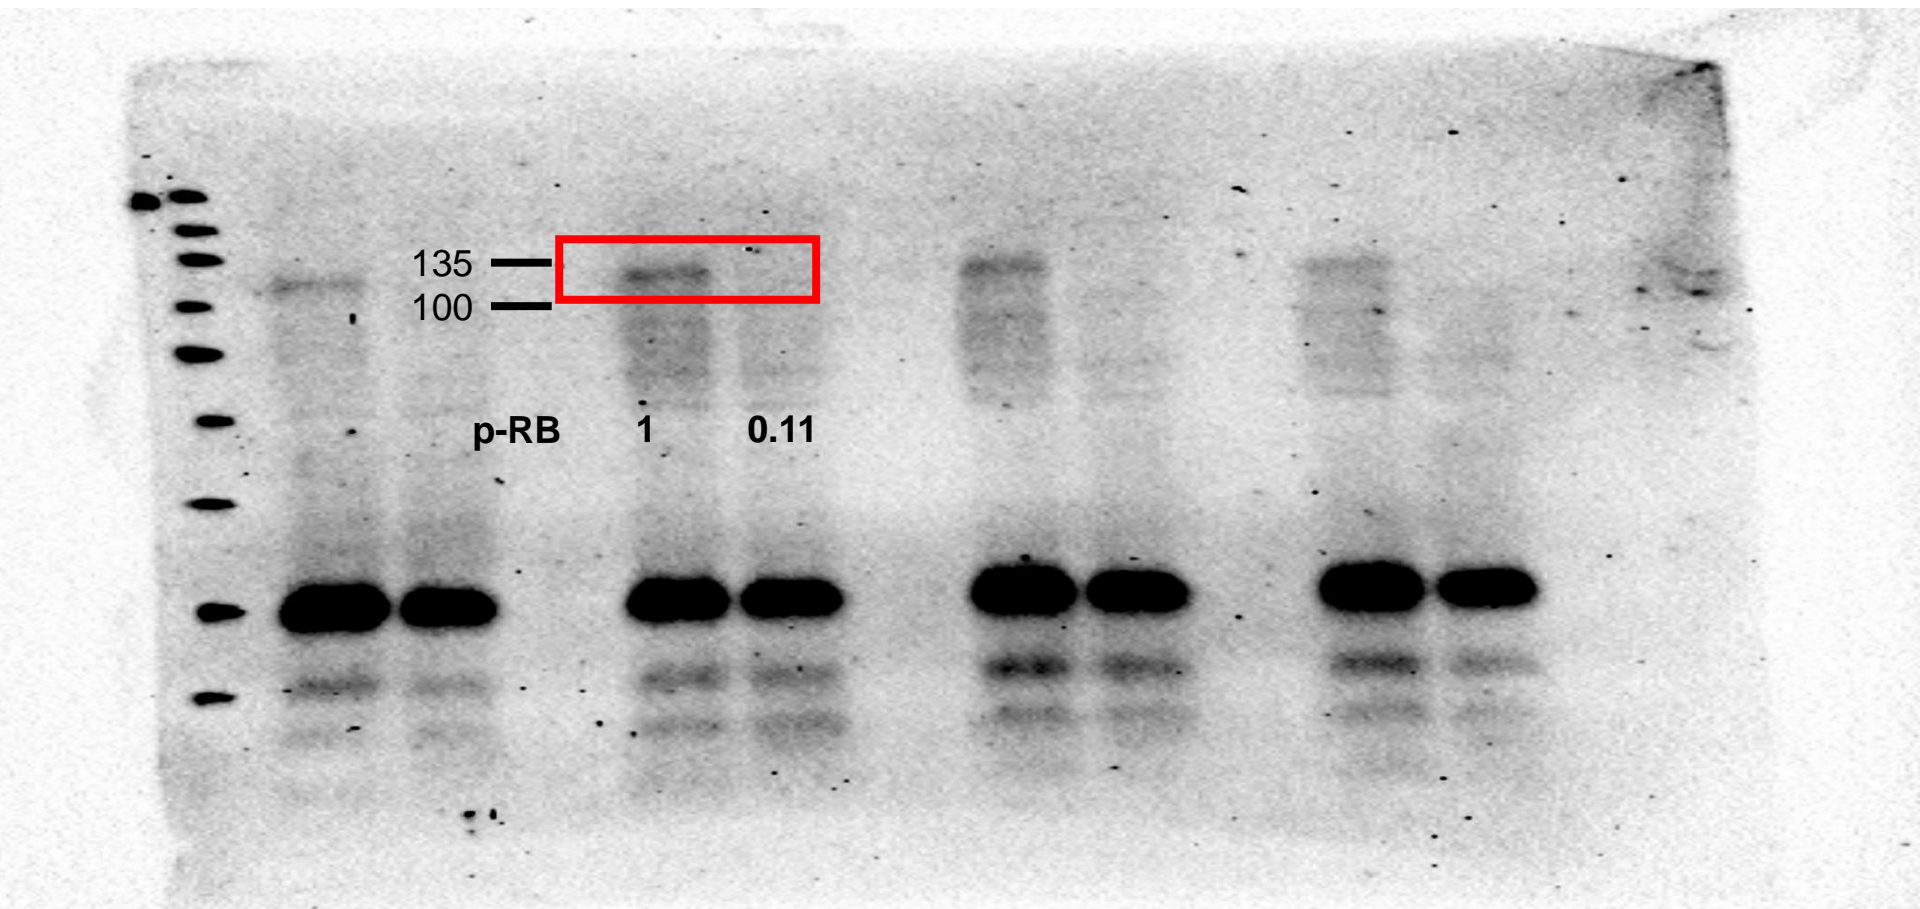

Fig. S8 T24, E7\_beta actin (p-RB)

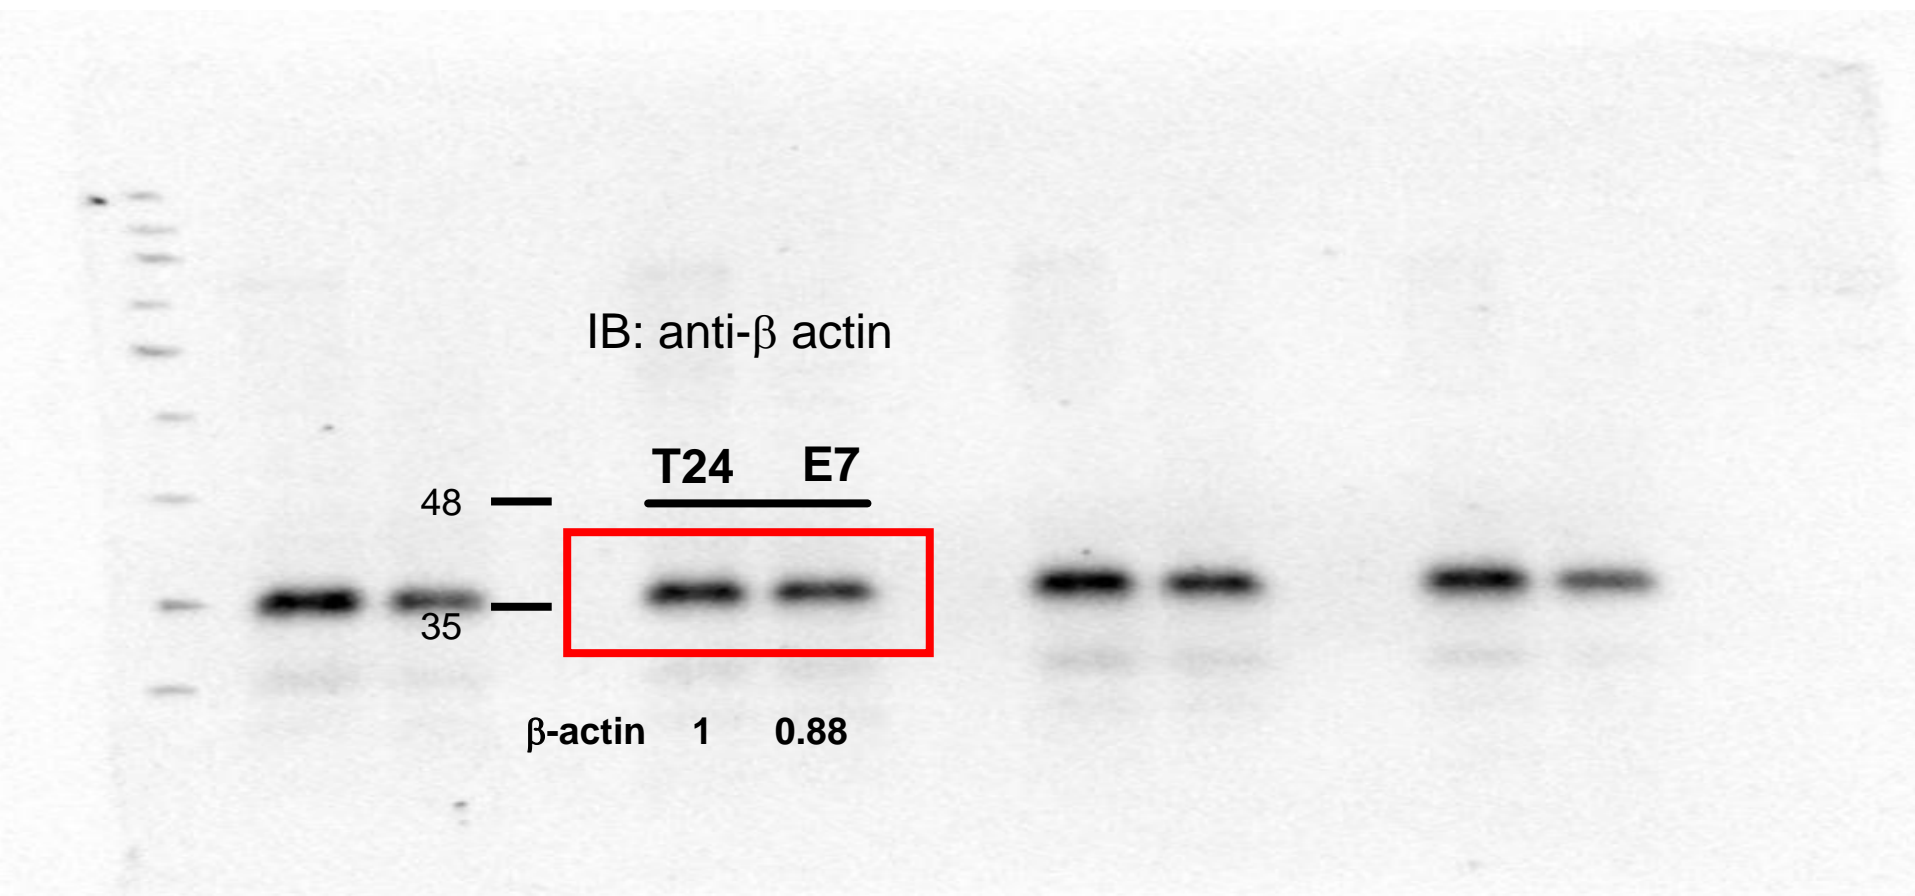

Supplement: s1 [file s1]
